# 1 **Cortical Hierarchy, Dual Counterstream Architecture and The Importance of Top-** 2 **Down Generative Networks**

3  
4 Julien Vezoli<sup>a§</sup>, Loïc Magrou<sup>b§</sup>, Rainer Goebel<sup>c</sup>, Xiao-Jing Wang<sup>d</sup>, Kenneth Knoblauch<sup>b</sup>,  
5 Martin Vinck<sup>a#</sup>, Henry Kennedy<sup>b,e#</sup>  
6

7  
8 <sup>a</sup> Ernst Strüngmann Institute (ESI) for Neuroscience in Cooperation with Max Planck Society,  
9 60528 Frankfurt, Germany

10 <sup>b</sup> Univ Lyon, Université Claude Bernard Lyon 1, Inserm, Stem Cell and Brain Research  
11 Institute U1208, 69500 Bron, France.

12 <sup>c</sup> Faculty of Psychology and Neuroscience, Department of Cognitive Neuroscience,  
13 Maastricht University, P.O. Box 616, 6200 MD, Maastricht, The Netherlands

14 <sup>d</sup> Center for Neural Science, New York University (NYU), New York, NY 10003, USA.

15 <sup>e</sup> Institute of Neuroscience, State Key Laboratory of Neuroscience, Chinese Academy of  
16 Sciences (CAS) Key Laboratory of Primate Neurobiology, CAS, Shanghai 200031, China  
17

18 § equal contributing

19 # corresponding authors  
20

## 21 **Abstract**

22 Hierarchy is a major organizational principle of the cortex and underscores modern  
23 computational theories of cortical function. The local microcircuit amplifies long-distance  
24 inter-areal input, which show distance-dependent changes in their laminar profiles. Statistical  
25 modeling of these changes in laminar profiles demonstrates that inputs from multiple  
26 hierarchical levels to their target areas show remarkable consistency, allowing the construction  
27 of a cortical hierarchy based on a principle of hierarchical distance. The statistical modeling  
28 that is applied to structure can also be applied to laminar differences in the oscillatory coherence  
29 between areas thereby determining a functional hierarchy of the cortex. Close examination of  
30 the anatomy of inter-areal connectivity reveals a dual counterstream architecture with well-  
31 defined distance-dependent feedback and feedforward pathways in both the supra- and  
32 infragranular layers, suggesting a multiplicity of feedback pathways with well-defined  
33 functional properties. These findings are consistent with feedback connections providing a  
34 generative network involved in a wide range of cognitive functions. A dynamical model

35 constrained by connectivity data shed insights into the experimentally observed signatures of  
36 frequency-dependent Granger causality for feedforward versus feedback signaling. Concerted  
37 experiments capitalizing on recent technical advances and combining tract-tracing, high-  
38 resolution fMRI, optogenetics and mathematical modeling hold the promise of a much  
39 improved understanding of lamina-constrained mechanisms of neural computation and  
40 cognition. However, because inter-areal interactions involve cortical layers that have been the  
41 target of important evolutionary changes in the primate lineage, these investigations will need  
42 to include human and non-human primates comparisons.

43

#### 44 **Keywords**

45 Non-human primate, human, brain, electrophysiology, anatomy, modeling, connectivity,  
46 predictive coding, perception, consciousness

47

#### 48 **Plan**

- 49 1. Introduction
- 50 2. Hierarchy – signatures of inputs to the local circuits.
- 51 3. Models of hierarchy
- 52 4. Hierarchy – input consistency
- 53 5. Dual stream architecture.
- 54 6. Functional characteristics of FF and FB pathways.
- 55 7. The predictive brain and the importance of top-down generative networks.
- 56 8. Conclusion.

57

## 58 **1. Introduction**

59 Hierarchy as an organizational feature of the brain has been a recurrent theme since the  
60 evolutionary theory of neurological disorders of John Hughlings Jackson (1835-1911),  
61 following his observations of positive and negative symptoms in his patients (York and  
62 Steinberg, 2011). The neurobiology of cortical hierarchy was explored by the pioneering work  
63 of David Hubel and Torsten Wiesel when they characterized the receptive field properties of  
64 simple, complex and hypercomplex neurons across areas of the visual cortex (Hubel and  
65 Wiesel, 1962). Following the work of Rockland and Pandya (1979) a myriad of connectivity  
66 studies in the cortex found additional evidence of hierarchical organization, allowing Felleman  
67 and Van Essen to propose the first hierarchical model of the cortex (Felleman and Van Essen,  
68 1991), thereby providing a framework for modern concepts of feedforward (FF) and feedback  
69 (FB) processes. The notion of hierarchy has become considerably generalized and for example  
70 can be considered to be the major concept linking biological and artificial intelligence (Hawkins  
71 and Blakeslee, 2004). Convolutional deep neural networks have a clear hierarchical  
72 organization, with convergent, FF connections passing information from lower to higher layers,  
73 and divergent FB connections shaping plasticity in the connections from lower layers (LeCun  
74 et al., 2015). But what exactly is the significance of hierarchy in the brain? Hierarchy has been  
75 extensively studied in terms of ranking of cortical areas with respect to a number of criteria  
76 including, gradients of structural and functional features, as a progression of scales or as a  
77 topological sequence of projections (Hilgetag and Goulas, 2020). Here we take a diametrically  
78 opposing view. Rather than simply considering hierarchy as a ranking of cortical areas, we  
79 address what it means in terms of monosynaptic inter-areal connectivity. In line with the tenet  
80 that the explanation of how the brain works demands an account of what neurons do, and that  
81 functional interactions of cortical areas is assured by neuronal activity relayed between areas  
82 by axons, we confine our discussion of hierarchy to the description of the neuronal properties  
83 of inter-areal relations. We propose that the structural and functional markers of hierarchy  
84 define the integration of long-range inputs into each local circuit. Future investigation of these  
85 markers are expected to provide insight to the cellular mechanisms underlying hierarchical  
86 processing. A critical aspect of these regularities concerns the spatial distances governing  
87 interactions between cortical neurons, which we and others have shown obey metabolic  
88 constraints in terms of wire minimization underlining the spatial embedding of the cortex  
89 (Markov et al., 2013). We discuss the functional implications of the Dual Stream Architecture  
90 (Markov et al., 2014b) in terms of FF and FB processing and where future investigations are  
91 expected to provide insight into the cellular mechanisms underlying hierarchical processing.

92 Finally, we cast FF and FB relations in terms of predictive processing theory and evoke the  
93 importance of top down generative networks.

94

## 95 **2. Hierarchy – signatures of inputs to local circuits.**

96 In 1989 Douglas, Martin and Whitteridge published a landmark study that proposed a  
97 canonical microcircuit for the neocortex (Douglas et al., 1989) (**Figure 1 and 10b**). A common  
98 misconception of the canonical microcircuit is that it constitutes solely a description of the inter-  
99 laminar wiring patterns of the cortex. In fact, it is much more a theory that sets out to explain  
100 the electrophysiological properties of the cortex in terms of local connectivity, in particular  
101 with respect to within-laminar connections. In an effort to nail down the transformation of the  
102 thalamic input, *in vivo* intracellular recordings were made in area V1 in cat cortex. This showed  
103 that minute inputs from the LGN are amplified by recurrent excitation in layer 4 neurons  
104 (Latawiec et al., 2000). Subsequent quantification of the synaptic components of the local  
105 circuit showed that high levels of within-layer recurrent excitation is a characteristic feature of  
106 the local circuit (**Figure 1**) (Binzegger et al., 2009). These experiments showed that the role of  
107 inhibition was not to carve out the selectivity of the neuron response but rather to exert a control  
108 over the amplitude of the response and therefore to maximize the inhibitory potentials in the  
109 optimal receptive field response (Douglas et al., 1995; Douglas et al., 1989). Subsequent work  
110 showed that there is a weak orientation response in the input to the cortex, meaning that the  
111 primary role of the recurrent excitation is the amplification of a signal and not its creation  
112 (Ferster et al., 1996).

113 For many years research on cortex was predominantly in carnivores and non-human  
114 primates, leading to the notion of the cortical column as a fundamental component of functional  
115 organization (Mountcastle, 1995). In these studies, electrophysiological recordings from  
116 electrode penetrations made perpendicular to the cortex found a conserved function in the depth  
117 of the cortex in passing from pia to white matter (Hubel and Wiesel, 1962; Mountcastle, 1957).  
118 In the visual system there were expectations that the columnar organization of the cortex would  
119 be both functional and structural, since physiologically demonstrated ocular-dominance  
120 columns appeared to co-localize with cortical territories labeled by transynaptic labeling  
121 following tracer injections in the eye (Hubel and Wiesel, 1977). However, close examination  
122 revealed important discrepancies in such a correspondence (da Costa and Martin, 2010)),  
123 suggesting that the link between cortical structure and function is to be found at a much finer  
124 scale. Thanks to work in the mouse visual cortex using the molecular tools that are available in  
125 this species, it has been confirmed that cortical responses to thalamic input are indeed the

126 consequence of an amplification (Harris and Mrsic-Flogel, 2013) (Lien and Scanziani, 2013)  
127 via the local recurrent excitation (Cossell et al., 2015; Douglas et al., 1995; Ko et al., 2011).  
128 These studies built on earlier findings of highly nonrandom features of synaptic connectivity in  
129 local cortical circuits, proposing that there is a skeleton of strong connections in a sea of weak  
130 connections (Song et al., 2005). Later it was shown that the rare strong connections in the  
131 lognormal distribution of synaptic weights are between neurons with similar receptive fields,  
132 meaning that neurons in the visual cortex listen most closely to a subset of their synaptic inputs  
133 (Cossell et al., 2015). These findings explain earlier observations showing that ongoing activity  
134 of a neuron (so called spontaneous activity) reflects the functional architecture (i.e. the  
135 backbone of strong connections) in which it is embedded (Tsodyks et al., 1999). The emerging  
136 picture is that layers 4, 3 and 2 neurons are organized into subnetworks so that the selectivity  
137 of the amplification is ensured by constraints at the scale of dendritic spines (Lee et al., 2016).

138 The principal wiring property of the canonical circuit is the recurrent excitation that is  
139 observed in all of the cortical layers including layer 4 (Binzegger et al., 2004). The relevance  
140 of the canonical microcircuit theory for understanding inter-areal processing became apparent  
141 when cortical connectivity was quantified. In fact, 80-90% of the connections of the cortex are  
142 in the local circuit spanning 1-2mm in the visual cortex (Markov et al., 2011). Except for the  
143 adjacent cortical area, the structural weight of the average input from a distant source area to a  
144 target area is several orders of magnitude *less* than the thalamic input (Markov et al., 2014a).  
145 These observations lead to the notion that amplification by local recurrent excitation is a general  
146 phenomenon, that allows selection and recombination of relatively small afferent signals  
147 (Douglas and Martin, 2007a, b). For instance, top-down signaling of selective attention  
148 multiplicatively modulates sets of sensory neurons (McAdams and Maunsell, 1999; Treue and  
149 Maunsell, 1996). In this manner, selective amplification by local circuit dynamics leads to all-  
150 or-none task switching (Ardid and Wang, 2013).

151 Early anatomists, working principally in non-human primates, distinguished between  
152 rostral directed connections that originate chiefly in the supragranular layers and terminate in  
153 layer 4 (Cragg, 1969; Kennedy and Bullier, 1985; Lund et al., 1975; Martinez-Millan and  
154 Hollander, 1975; Rockland and Pandya, 1979; Spatz et al., 1970; Van Essen and Zeki, 1978;  
155 Wong-Riley, 1978) and caudal directed connections that mostly originate from infragranular  
156 layers and terminate outside of layer 4 (Kaas and Lin, 1977; Kennedy and Bullier, 1985;  
157 Kuypers et al., 1965; Tigges et al., 1973; Wong-Riley, 1978). In a landmark study, Rockland  
158 and Pandya (Rockland and Pandya, 1979) were the first to formulate inter-areal connectivity in  
159 terms of hierarchy and suggested that the laminar organization of cortical afferents and their

160 terminals indicates the sequence of information processing in cortex. These authors proposed  
161 that connections originating from supragranular layers and terminating in layer 4 by analogy  
162 with the main thalamic input to cortex constitute the FF pathway channeling sensory  
163 information to cortical areas carrying out higher-order analyses. By contrast connections arising  
164 from the infragranular layers, by analogy with descending projections to subcortical structures,  
165 correspond to FB connections and were postulated to enable higher order areas to be able to  
166 modulate the activity of lower level areas (Rockland and Pandya, 1979).

167

### 168 **3. Models of Hierarchy.**

169 The classification of pathways between areas as FF and FB helped motivate the  
170 investigation of the role of the cortical network in terms of FF pathways shaping receptive fields  
171 in their target areas (Hubel, 1995) and FB pathways relaying contextual information (Gilbert  
172 and Li, 2013; Zipser et al., 1996). How the cortical network related to the mosaic of cortical  
173 areas was given substance by Felleman and Van Essen's demonstration that the layout of  
174 cortical areas corresponded to a distributed hierarchy (Felleman and Van Essen, 1991). In their  
175 seminal study these authors established a definition of FF and FB connections largely  
176 employing the criteria of Rockland and Pandya (1979), and although principally based on  
177 laminar patterns of anterograde labeling they were able to stipulate criteria so as to include  
178 retrograde labeling therefore enabling them to define pathways with respect to findings reported  
179 in a large number of publications (**Figure 2A**). Pairwise comparisons of the connections linking  
180 areas using these criteria revealed a high regularity; connections that were classified as FF were  
181 largely reciprocated by FB connections, allowing the authors to establish a distributed hierarchy  
182 across multiple streams in the macaque visual cortex shown in **Figure 2B**. Because of the many  
183 parallel pathways and given that hierarchical levels were defined arbitrarily, it meant that the  
184 precise ordering of cortical areas was ill-defined. Computational modeling showed that there  
185 were over 150,000 equally plausible solutions to the Felleman and Van Essen Model (Hilgetag  
186 et al., 1996) (**Figure 2C**).

187 A solution to the indeterminacy of the Felleman and Van Essen model could be  
188 overcome by an objective localization of hierarchical level. A suggestion that this might be the  
189 case was the observation that injections of retrograde tracers in a target area in one of the early  
190 visual areas generated a progressive decrease in the numbers of labeled FB neurons in  
191 supragranular layers in source areas with increasing physical rostral distance (**Figures 3A**)  
192 (Kennedy and Bullier, 1985). Quantitative measures of interareal connectivity showed that  
193 patterns of retrograde labeling were highly consistent across different brains, provided that

194 labeled neurons are summed across the full extent of a projection zone, defined as the region in  
195 a particular source area which contains projections to an injected target area (**Figure 3B,C**).  
196 Subsequently injections in cortical areas at higher hierarchical levels generated a progressive  
197 increase in the numbers of labeled FB neurons in supragranular layers with increasing physical  
198 caudal distance. In this manner FF and FB pathways exhibited opposing gradients of projection  
199 neurons (Barone et al., 2000; Kennedy and Bullier, 1985; Markov et al., 2014b). These  
200 observations led to the definition of an index of this gradient based on the proportion of  
201 Supragranular Labelled Neurons or SLN (Barone et al., 2000; Vezoli et al., 2004). Because  
202 these changes are highly consistent across brains, the smooth gradients of inputs from neurons  
203 in different layers and areas to a target area lead to the derivation of a hierarchical distance rule  
204 (**Figure 3B**).

205 The transition from a binary model of hierarchy to one based on hierarchical distance  
206 had important consequences. One way of thinking about these connectivity gradients (**Figure**  
207 **3A**) is that they represent gradual changes in the composition of inputs to the local microcircuit  
208 of a cortical area that is dependent on physical distance. Elsewhere we have shown that input  
209 strength to cortical areas declines exponential with distance (Ercsey-Ravasz et al., 2013). In  
210 terms of hierarchy, the strong nearby connections are near-lateral and with increasing distance  
211 connections are progressively more FB or FF in nature.

212 If these changing inputs to the local microcircuit represent the structural signature of  
213 hierarchy it is legitimate to wonder if they have a functional correlate? If this is the case, then  
214 Pascal Fries and his team reasoned that one can derive a functional hierarchy (Bastos et al.,  
215 2015b). The hierarchical distance rule is based on the fact that supragranular layers primarily  
216 send FF projections and infragranular layers FB projections. In the visual system, superficial  
217 and deep layers are characterized by relatively strong gamma and alpha/beta oscillations,  
218 respectively (Buffalo et al., 2011). Furthermore, whereas in early visual areas, gamma  
219 oscillations are relatively strong (Gray et al., 1989), beta oscillations tend to be strong in higher  
220 areas like those in parietal cortex (Brovelli et al., 2004; Scherberger et al., 2005). These  
221 observations lead to the prediction that in the visuo-parietal system interareal synchronization  
222 in the gamma frequency band mediates FF and interareal synchronization in the alpha- and  
223 beta-frequency band mediate FB influences. Granger-causality was used to quantify functional  
224 FF and FB interactions, thereby allowing the strength of these interactions to be quantified for  
225 individual frequency bands. Neuronal populations show spontaneous fluctuations over time that  
226 are driven by brain rhythms in different frequency bands, such as theta (3-8Hz), alpha (8-12Hz),  
227 beta (12-30Hz) and gamma (30-80Hz). Note, neocortical rhythms do not comprise band-limited

228 sinusoidal oscillation but typically describes noisy oscillations with energy in a wide frequency  
229 range (Burns et al., 2011; Spyropoulos et al., 2020). Frequency-specific directed influences of  
230 rhythmic synchronization are correlated with hierarchical distance, FF pathways are  
231 characterized by synchronization in the theta (4 Hz) and gamma-band (60-80 Hz) and FB in the  
232 beta-band (14-18 Hz) (Bastos et al., 2015b). These observations mean that the structural  
233 signatures to the microcircuit are indeed paralleled by functional signatures (Bastos et al.,  
234 2015b). However, whereas the structural hierarchy is fixed these authors were able to show  
235 that activity patterns underlying functional hierarchy exhibit task dependent dynamics.

236 Using empirical connectivity data as a structural substrate, Mejias et al. (Mejias et al.,  
237 2016) built a dynamical model of multi-regional macaque monkey cortex endowed with a  
238 laminar structure. The model captures stochastic fast oscillations in the gamma frequency range  
239 in the superficial layers, and lower-frequency (alpha) oscillations in the deep layers.  
240 Importantly, in contrast to regular oscillators, such network rhythms are quite irregular and  
241 noisy, compatible with the notion of sparsely synchronous brain rhythms (Wang, 2010), which  
242 provides a unifying framework for explaining both population oscillations and Poisson-like  
243 highly variable spike trains of single neurons. The model accounts for the distinct signatures of  
244 frequency-dependent Granger causality that reflect FF versus FB signaling, and reproduces the  
245 experimentally deduced neural population dynamics that are consistent with the anatomically  
246 defined hierarchy. Therefore, this model provides a computational platform for theoretical  
247 investigations of the interplay between feedforward and feedback processes.

248 Both structural and functional hierarchies show that the regularities stemming from  
249 laminar distributions of connections and the signals they confer are remarkably consistent. In  
250 the following section, we address the extent of this consistency in order to formalize how  
251 hierarchy inputs to an area are shaped by distance.

252

#### 253 **4. Hierarchy – Input Consistency.**

254 The notion of hierarchy implies order or rank, so that a prerequisite to determining if  
255 there are hierarchical relations between cortical areas requires determining if order relations  
256 can be defined between them. For example, the Felleman and Van Essen hierarchy was based  
257 on the binary classification of FB/FF relations between areas defined by laminar origin and  
258 termination of projections (Felleman and Van Essen, 1991). A FF projection from area A to B  
259 implied that B was ordered after A. Similarly, a FB projection from B to A would also be  
260 consistent with the above FF relation in assigning B after A. While in a hierarchy we would  
261 expect the two criteria to agree that might not in fact be the case. On a simple level,



262 disagreement could be taken to define equality of ordinal levels in the sense that equality is  
263 defined as those numbers,  $A$  and  $B$ , that simultaneously satisfy  $A \geq B$  and  $A \leq B$ .  
264 Alternatively, distinct hierarchical orders might arise: one on the basis of FF laminar  
265 projections, the other on the basis of FB. These observations become important when the data  
266 supporting multiple laminar FB/FF pathways are analyzed.

267 The criteria for determining hierarchical rank described above are based on the  
268 properties of projections that define relations between areas. Alternatively, one can consider  
269 properties that are intrinsic to an area, such as cortical thickness, neuron density, soma size,  
270 spine count, spine density and dendritic tree size. These properties have been shown to display  
271 a smooth variation across the cortex that allows ranking of areas in accordance with the  
272 gradation principle of Sanides (Barbas, 2015; Sanides, 1972). Because these properties vary  
273 across the cortex, a hierarchical ranking can be established simply by ordering the areas  
274 according to the property. This distinction leads us to consider that criteria for building cortical  
275 hierarchies can be divided into two broad classes that we shall refer to as *node-based* and *link-*  
276 *based* (**Figure 4A**).

277 Here it is useful to draw an analogy with social networks. A hierarchy in a social  
278 network implies that the actors show specific kinds of interactions with each other (*link-based*).  
279 Hierarchy implies that those close to each other in a hierarchy show stronger interactions with  
280 each other than actors that are distant in the hierarchy. More information can be gauged from  
281 the nature of the interactions: We expect that someone high in the hierarchy (a boss) will show  
282 a more directive communication pattern to workers lower in the hierarchy. The workers, in turn,  
283 will show a different ascending communication pattern, e.g. asking more questions. Thus, a  
284 hierarchy can be constructed by studying the way in which people interact with each other, and  
285 knowing a hierarchy could in principal allow us to predict these interactions. By analogy, the  
286 SLN can be seen as a measure that directly quantifies the nature of the interactions between  
287 brain areas, based on the laminar projection patterns. Interestingly and as we described above,  
288 these laminar projection patterns also relate to certain functional interaction patterns (FF  
289 gamma and FB alpha/beta influences). In addition, social hierarchy might also be gauged from  
290 properties of the people in the hierarchy themselves. For instance, one expects the boss of the  
291 company to have the largest office, whereas the workers at the bottom to share an office and  
292 have smaller desks (*node-based*). In some sense, one could argue however, that the *node-based*  
293 view is based only on indirect markers and is ultimately grounded in the interaction *link-based*  
294 view.

295           There are critically important differences for constructing hierarchies between node and  
296 link-based information. By definition, node-based relations depend only on a value intrinsic to  
297 the node, not the relations between nodes so they give no information on the symmetry or  
298 otherwise of inter-areal relations. By contrast, ranks based on links are expected to show  
299 reciprocity, so that if there is FF pattern from area A to area B, a FB pattern is expected from  
300 area B to area A. Node based criteria are defined between *any* two areas independently of  
301 whether or not a connection is actually present. Link-based criteria can provide information on  
302 asymmetric relations, provided they are directional and are strictly defined between areas *only*  
303 when there is a direct connection. Nevertheless, hierarchical ordering between unconnected  
304 areas can be achieved through indirect connections. Generally, link-based hierarchy describes  
305 the connections that are carrying information between areas and therefore the manner in which  
306 the connections and activity from source areas are integrated into the local circuit of the target  
307 area.

308           In order to define a hierarchical distance scale, i.e., that is not just ordinal, a distance  
309 function,  $d$  has to be defined. This function  $d$  should transform whatever anatomical or  
310 physiological measure one is using into a consistent measure of hierarchical distance across  
311 cortical areas. For example, **Figure 4B** shows a hypothetical distance scale on which 4 areas,  
312 A, B, C, D, are arranged. Suppose that hierarchical distances are estimated based on measures  
313 derived from tracer injections in areas A and B. The injection in area A provides information  
314 about hierarchical distances to areas B, C and D and the injection in B to areas A, C and D. A  
315 consistent measure of hierarchical distance,  $d$ , would generate the same estimate of distance,  
316  $d_{AB}$ , between areas A and B or, formally, we would expect that  $d_{CA} - d_{CB} = d_{DA} - d_{DB}$ . This is  
317 easily derived from the two equations in **Figure 4B** that show for two areas, C and D, the  
318 expected relation between the hierarchical distances of a common area to C or D to two areas  
319 sites, A and B. For common projections X, plotting  $d_{XA}$  against  $d_{XB}$  should fall along a line of  
320 unit slope with intercept  $d_{AB}$ . The question is how to define the distance function  $d$ .

321           In contrast to the binary measure of hierarchy in the Felleman and Van Essen model,  
322 SLN is a continuous measure on the interval (0, 1), thus providing a measure of the degree of  
323 feedforwardness/feedbackness. A binary description treats a projection as FF (FB) if its SLN is  
324 greater (less) than 0.5. Using simply the SLN differences as a hierarchical distance measure,  
325 the Barone et al., 2000 study was able to reproduce nearly all of the features of the Felleman  
326 and Van Essen model based on the SLN values from injections in just two areas, V1 and V4.  
327 A notable exception is that the Barone et al. 2000 study placed the frontal eye field (FEF), this  
328 prefrontal area, *below* the early extrastriate visual area V4. The SLN value from FEF to V4 was

329 above 0.7 which placed V4 at higher hierarchical levels. Subsequent physiological studies  
330 confirmed an FEF role in early visual processing (Moore and Armstrong, 2003; Schall, 2015),  
331 thus justifying its relatively low hierarchical level. The unusual FF pattern for such a caudally  
332 directed projection was further confirmed in other studies (Pouget et al., 2009) and pertains to  
333 a specific link-category on which we expand later.

334 While differences in SLN establish a determinate hierarchical distance measure between  
335 areas, the measure is not necessarily consistent in the manner described in **Figure 4B**. As the  
336 measure is defined on the interval (0, 1), SLN differences for two areas projecting to a third  
337 area could be quite different from those to another more distant area. An ideal measure would  
338 project the interval (0, 1) to a scale where differences remain linear. This is commonly  
339 accomplished in statistical models, such as generalized linear models (GLM), by means of a  
340 logit or probit transformation (**Figure 4C**) that map the unit interval onto the real line. As the  
341 figure demonstrates, with the proper scaling both of these transformations yield rather similar  
342 mappings.

343 **Figure 5** shows a set of scatter plots for SLN values of common projections for all area  
344 pairs between each of 11 visual areas injected with retrograde tracer (Markov et al., 2014b).  
345 The SLN values are plotted on probit transformed axes. For many of the area pairs, the point  
346 distributions are reasonably well described by a line of unit slope (dashed blue in each graph),  
347 as predicted by a consistent measure of distance, i.e.,  $g(\text{SLN}_j) = g(\text{SLN}_i) + c$ , where  $c$  is a  
348 constant. Given the similarity of the transforms, it is not surprising that the logit transformation  
349 yields virtually the same linear patterns between area pairs. Thus, this indicates that the ratio of  
350 supra- and infra-granular projections follows a gradient across the cortical areas and constitutes  
351 a global signature of hierarchical distance among these areas.

352 Is this laminar pattern of connectivity specific to the visual system or is it a more general  
353 principle of organization of FF and FB pathways in the brain? In support of the latter  
354 hypothesis, **Figure 6** shows paired scatter plots of SLN values for a set of 8 somatosensory and  
355 motor areas in the same format as **Figure 5**. As in the visual system, the transformed SLN  
356 values, here by the similar logit function, provide evidence of a consistent distance measure in  
357 the hierarchical organization among these areas.

358 To quantify the consistency displayed in these pairs plots, we proposed a model to  
359 estimate hierarchical distances based on SLN values, but as we argue below, the model is quite  
360 general in its application. In short, we suppose that we can assign hierarchical levels,  $h_i$  and  $h_j$ ,  
361 to all area pairs  $i$  and  $j$ , based on a measure of differences between properties linking the areas.  
362 For example, in the case of SLN, we suppose

363  $g(\text{SLN}_i^p) - g(\text{SLN}_j^p) = h_i - h_j,$

364 where  $g$  applies a logit or probit transformation to SLN values, from an injection into area  $p$   
365 that receives projections from areas  $i$  and  $j$ . This suggests a formalism similar to a GLM with  
366 a binomial family. The SLN is taken as a binomial variable (neurons are found in the upper or  
367 lower cortical layers) and the sum of neurons in both compartments is used as a weight.

368 The key feature of the model that relates the estimates of hierarchy to the biological  
369 measure (i.e. the transformed SLN values) is the incidence matrix,  $\mathbf{X}$ , of the cortical graph. The  
370 incidence matrix of the graph is defined to have a column for each node and a row for each  
371 link. In each row, all values are 0 except for the two nodes of the link, taking on values of -1  
372 and 1, respectively for source and target, if the link is directed. The product of the incidence  
373 matrix and the vector of hierarchical values,  $h$ , maps the differences in hierarchical value  
374 between two areas with the differences between the transformed SLN, such that:

375 
$$g(\text{SLN}_i^p) = \mathbf{X}h$$

376 where the left side of the equation is the difference between transformed SLN values of the  
377 source area  $i$  and the injection site  $p$ . The vector  $h$  contains the hierarchical coefficients to  
378 estimate and its length is equal to the number of columns of the model matrix. The model as  
379 defined is not identifiable because the sum of every row equals 0, but by dropping one column,  
380 for example, area V1 in the visual hierarchy, the hierarchical coefficients can be estimated with  
381 the area corresponding to the dropped row fixed at a hierarchical level of 0.

382 This resembles a logistic or probit regression problem. However, these models yield  
383 standard errors for the estimated coefficients that are unrealistically small. Alternatively, we  
384 have used a beta-binomial model; this arises naturally as a binomial model in which the  
385 response, which in the current context is the expected SLN value, has variability greater than  
386 that specified by the binomial distribution and its distribution is described by a beta distribution  
387 (Lesnoff and Lancelot, 2012). For present purposes, the model can be reparameterized to  
388 include a dispersion parameter that better models the overdispersion typically observed in  
389 neural counts (see (Markov et al., 2014a) for further details). Once the statistical model is  
390 specified, the coefficients are estimated by maximum likelihood. Note that because numbers  
391 of neurons are used in the model and not just the SLN proportions, this method generates a  
392 weighted hierarchy.

393 The formalization is quite general. For example, if instead of SLN, a binary variable is  
394 used simply specifying whether a connection is of a FF or FB type, then the model corresponds  
395 to the original problem that Felleman and Van Essen solved. We have found that fitting the

396 model in this fashion leads to coefficients with much larger standard errors (**Figure 7A**), thus,  
397 providing an alternate demonstration of the indeterminacy or more limited information on  
398 hierarchy contained in purely binary relations. Thus, the use of a quantitative measure of  
399 hierarchy leads to a more exact solution (**Figure 7B**).

400 To summarize, a qualitative assessment of a hierarchical gradient is initially evaluated  
401 visually by choosing a (possibly transformed) measure of the hierarchical difference between  
402 area pairs and using pairs plots to assess the pairwise consistency of the distance measure. If  
403 the evidence looks promising, the hierarchical values are obtained by fitting a model that maps  
404 the hierarchical estimates to the biological measure of the gradient via the network incidence  
405 matrix. If a suitable probability distribution can be assigned to the biological measure, the  
406 solution can be obtained by maximum likelihood, but other methods, for example introducing  
407 Bayesian priors, might be applied in appropriate circumstances.

408 The visual hierarchy estimated from our model is shown in **Figure 8A** and resembles  
409 qualitatively the Felleman and Van Essen model (Felleman and Van Essen, 1991). In contrast,  
410 the levels are continuously distributed. Here we have split FEF into area 8L and 8M  
411 corresponding to regions involved in small and large saccades, respectively. Area 8L occupies  
412 a low position in the hierarchy while 8M is several levels higher. The goodness of fit of the  
413 model is indicated by plotting the empirical SLN values against those predicted by the model  
414 (**Figure 8B**) and shows that the model accounts for a high proportion of the variance in the  
415 data. The functional implications of this model have been explored in several contexts (Bastos  
416 et al., 2015b; Chaudhuri et al., 2015; Magrou et al., 2018) and observations indicate that it is  
417 applicable to anterograde tracing data from the mouse (D'Souza et al., 2020).

418 The use of a transformation of SLN to estimate hierarchical distance imposes strong  
419 constraints on inter-areal SLN relations. We demonstrate this in **Figure 8C** by using the logit  
420 transform, which performs quantitatively nearly identically to the probit transform (**Figure 4C**),  
421 but allows expression of the hierarchical relations in terms of ratios of projection strengths. The  
422 model defines hierarchical distance,  $h_{ij}$ , between two areas,  $i$  and  $j$ , as the difference between  
423 the logit of SLN values for their projections to a target area,  $p$ , shown in the top equation. For  
424 the logit, this distance is just the natural log of the ratio of ratios of supra- to infragranular  
425 projection strengths from areas  $i$  and  $j$  to  $p$  (orange arrows in **Figure 8C**, left). If the hierarchical  
426 distance measure is consistent, we expect that ratio to be the same for projections to any other  
427 area,  $q$ , (blue arrows in **Figure 8C**, left) as shown by the equation below the diagram. A simple  
428 rearrangement of this identity demonstrates that the ratio of projections from area  $i$  to areas  $p$   
429 and  $q$  (orange arrows in **Figure 8C**, right) should be the same for any other area  $j$ , projecting to

430 areas p and q. Thus, the hierarchical model we propose implies strong invariances in the ratio  
431 of FF to FB projection strengths from common inputs and outputs across areas. We further  
432 hypothesize that these invariances impose constraints on the exchange and stability of  
433 information flow across the cortical hierarchy.

434 One might suppose that when simultaneous retrograde tracer injections are made in  
435 reciprocally connected areas that the pair of areas would display a reciprocal FF-FB relation.  
436 That is to say, the origin of the majority of projections from one area would arise from upper  
437 layers and the principal origin of the reciprocating projections from lower layers. This  
438 arrangement would naturally lead to the hierarchical regularities that we observe. However,  
439 this regularity is not imposed by our model, nor is it always found to occur. In effect, this is  
440 what explains the surprising observation (noted above in the hierarchy derived in **Figure 8A**)  
441 of a prefrontal area like 8L at the same hierarchical level as early visual areas V3 and V4. As  
442 expected, the projections from several lower order visual areas, e.g., V4 and TEO, to area 8L  
443 originate in upper layers signifying FF, projections. However, 8L projects back to these areas  
444 through FF projections also originating in upper layers (Barone et al., 2000; Markov et al.,  
445 2014b). We designate such FF-FF connections as strong loops (Crick and Koch, 1998). They  
446 correspond to the situation described earlier in an order relation that when  $A \geq B$  and  $B \geq A$ ,  
447 then  $A = B$ .

448 In the Felleman and Van Essen model, FF (FB) projections connect upstream  
449 (downstream) areas in a bottom-up (top-down) fashion placing hippocampus, anterior temporal  
450 and prefrontal areas at the top and occipital areas at the bottom of the visual hierarchy. As such,  
451 this model described two main counterstreams involved in hierarchical processing within the  
452 visual system: a rostro-caudal gradient of FB projections reciprocated by a caudo-rostral  
453 gradient of FF projections. Interestingly, in the data base of visual areas on which the Felleman  
454 and Van Essen model was based, only one pathway was reported – between FEF and CITd  
455 (dorsal part of inferior temporal cortex) that corresponds to a strong loop. This led Crick and  
456 Koch (Crick and Koch, 1998) to speculate that such configurations were forbidden in cortical  
457 organization. However, we have identified a significant number of strong loops in our data  
458 base. **Figure 8D** shows how the  $\log_{10}$  FLN varies as a function of distance estimated through  
459 the white matter from the source area to the target injection site, referred to as white matter  
460 (WM) distance), replotted from Ercsey-Ravasz et al. (Ercsey-Ravasz et al., 2013). The beige  
461 points correspond to those connections that participate in strong-loops i.e. area pairs for which  
462 SLN is greater than 0.5 in both directions. For reference, the saturation of these points indicates  
463 their SLN values with less saturated points indicating a higher SLN, as shown by the inset color

464 bar. As expected, most of the SLN values near 1 cluster to the right as more long distance  
465 connections. There is a fair amount of scatter among the points but they do display a distance  
466 rule (blue regression line) just as the rest of the connections do (black regression line).  
467 Interestingly, the strength of the strong loop projections is on average greater than the rest of  
468 the projections. This suggests that they are likely to play a unique role in cortical computation.  
469 What that role is currently remains a mystery. However, there is experimental evidence in favor  
470 of an attentional role concerning the strong-loop between FEF and V4. FEF projections can  
471 drive attentional response in V4 (Moore and Armstrong, 2003), through selective gating of V4  
472 receptive-fields (Armstrong et al., 2006). Further evidence points to the involvement of fast  
473 rhythmic synchronization during FEF attentional modulation of V4 visual responses (Gregoriou  
474 et al., 2012; Gregoriou et al., 2009), strongly suggesting a supragranular origin (Bastos et al.,  
475 2015a; Markov et al., 2014b).

476 The results reveal a high-degree of consistency of the structural regularities underlying  
477 cortical hierarchy in the sensory cortex. But how generalizable are these findings across the  
478 more anterior regions, particularly in frontal and prefrontal cortex (Badre and D'Esposito, 2009;  
479 Choi et al., 2018)? One of the few studies that has addressed the structural hierarchy with tract  
480 tracing of the prefrontal cortex (Goulas et al., 2014) found little evidence of the rich rostral to  
481 caudal hierarchical organization that has been reported in human imaging studies (Badre and  
482 D'Esposito, 2007; Koehlin et al., 2003). The controversial issue of frontal cortex and  
483 hierarchical control shows promise of resolution via a revision of the concept of a unitary model  
484 ensuring a unidimensional gradient. Recent reports favor distinct networks that are proposed to  
485 interact thereby ensuring a global hierarchical structure (Schumacher et al., 2019).  
486 Nevertheless, the mismatch between the multistage cascade architecture mediating a temporal  
487 organization of cognitive control and inter-areal connectivity contrasts with the situation in the  
488 visual cortex where there is a smooth increase in receptive field size ascending the Felleman  
489 and Van Essen cortical hierarchy (Roelfsema and de Lange, 2016). The mismatch reported in  
490 the prefrontal cortex is between the concept of a smooth and gradual rostral-caudal organization  
491 found in the imaging studies and the connectivity as found in the collated and binary data base.  
492 What about the relation of SLN across prefrontal areas? In **Figure 9A**, the SLN pairs plots for  
493 the prefrontal cortex show an encouraging agreement with that described in visual cortex. The  
494 hierarchical scale values estimated from the statistical model described above (**Figure 9B**) seem  
495 to support a rostral-caudal organization with F1 at the bottom and areas 10 and 24c (the most  
496 anterior limbic region) at the top. Note, analysis based on more complete coverage of the frontal  
497 cortex might give significantly improved results.

498

499 **5. Dual stream Architecture and its functional significance.**

500 In the preceding section we showed that the contributions of supra- and infragranular  
501 layers in the projections across hierarchical levels were highly consistent. The consistency of  
502 our measure of hierarchical distance, in conjunction with the known differences in oscillatory  
503 properties of laminar compartments of the cortex, suggests that FF and FB interactions are not  
504 only anatomically distinct, but (i) use specific frequencies for communication and (ii) play  
505 specialized roles in cortical computation. Here we address how these functional properties  
506 relate to the detailed anatomical properties of FF and FB pathways. In the light of recent  
507 findings showing FF and FB constitute distinct pathways in both the upper and lower layers  
508 constituting a Dual Stream Architecture (Markov et al., 2014b), leads to the hypothesis that FB  
509 signals in upper and lower layers have distinct roles in information processing.

510 There are a number of reasons for expecting that supra- and infragranular layers might  
511 house different FF and FB pathways. During corticogenesis the supragranular compartment is  
512 generated by a primate-specific germinal zone (Smart et al., 2002), exhibiting uniquely complex  
513 lineages (Betizeau et al., 2013; Dehay et al., 2015; Lukaszewicz et al., 2005), findings that have  
514 consequently been amply confirmed in human corticogenesis (Geschwind and Rakic, 2013).  
515 These specialized developmental origins of the supragranular layers are linked to the observed  
516 expansion of these layers in primates culminating in human (Cahalane et al., 2014; Sousa et al.,  
517 2017), and a diversification of cell-types, which we speculate underlies the observed coding  
518 properties of these layers in the adult primate cortex (Tang et al., 2018; Vinje and Gallant, 2000;  
519 Wang and Kennedy, 2016; Willmore et al., 2011). A number of studies have shown that  
520 supragranular layers exhibit sparse coding in which large numbers of cells are characterized by  
521 low levels of activity and a sensory stimulus activates only few neurons (Barth and Poulet,  
522 2012; Crochet et al., 2011; Haider et al., 2013; Harris and Mrsic-Flogel, 2013; Petersen and  
523 Crochet, 2013; Tang et al., 2018). In a sparse code information is encoded at any instant by the  
524 spiking of a small number of neurons, as opposed to a dense code where overall activity is high  
525 and information is encoded by variation in firing rate as observed in the infragranular layers  
526 (Sakata and Harris, 2009). A sparse code reduces redundancy and is arguably more efficient.  
527 Studies indicating sparse coding in supragranular layers find evidence of higher levels of  
528 recruitment of inhibitory drive in these layers via fast spiking PV+ neurons (Hu et al., 2014),  
529 which supports the presence of distinct frequency channels for FB and FF communication  
530 (Bastos et al., 2018; Bastos et al., 2015b; Michalareas et al., 2016). In addition, sparse coding,



531 supragranular neurons in area V1 showed more complex and specific selectivity than expected  
532 for primary visual cortex (Bonnefond et al., 2017).

533 A more detailed description of the laminar organization of inter-areal connectivity  
534 suggests that variation of SLN with distance has complex origins concerning inter-areal  
535 connectivity in sublayers of the cortex. Exhaustive examination of inter-areal connectivity  
536 shows, that whereas canonical FB streams have been traditionally allocated to infragranular  
537 layers, a robust supragranular FB stream is in addition found in layer 2 in all areas examined in  
538 the extrastriate visual cortex of the macaque (**Figure 10A**) (Markov et al., 2014b). In addition  
539 to the layer 2 FB, we found some evidence of a layer 5 FF stream. Hence, in both upper *and*  
540 lower compartments there is a counter stream leading to the term dual counterstream  
541 architecture. Interestingly, the two FB streams in the supra and infragranular layers will impact  
542 differently the canonical microcircuit (**Figure 10B**) (Douglas et al., 1989). The strict  
543 segregation of FF and FB streams was hypothesized by Ullman in his counterstream model,  
544 which he proposed allows a bi-directional search for optimal matches between descending and  
545 ascending pathways (Ullman, 1995, 2000).

546 Closer examination of the individual streams showed that each obeys a unique distance  
547 rule. In all streams labeled cell counts decline with WM distance, however the rate of decline  
548 is characteristic for a given stream. In this way, the classical FB stream in layer 6 of the  
549 infragranular layers has the most gradual decline so that these FB connections span the biggest  
550 distance in the cortex. This contrasts with the layer 2 FB, which shows a much shorter space  
551 constant. Hence it is the combination of the space constants of the layers 2 and 6 FB streams  
552 that leads to the observed SLN values going up stream from near to far-distant areas (See **Figure**  
553 **11**). The classical FF stream in L3 is also long-distance stream, but significantly less than the  
554 FB layer 6 stream, thus leading to the observation of the greater reach of FB pathways compared  
555 to FF pathways (Markov et al., 2014b).

556 Hence, the dual counterstream architecture shows that the relative rate of decline in  
557 individual streams determines the way that SLN is modulated by WM distance. In the previous  
558 section (Hierarchy –input consistency) we showed that the agreement between SLN values  
559 across hierarchical levels is relatively constant across the extrastriate macaque cortex, but less  
560 so for the prefrontal cortex. These differences between frontal and posterior regions could be  
561 driven by two sets of factors. Firstly, quite simply the space constant can change in individual  
562 layers so that the two regions sample supra- and infragranular layers over different WM  
563 distances. For example, if the difference in space constants of layer 2 and 6 FB streams are

564 reduced then so are the SLN differences and there will be a reduction of the hierarchical distance  
565 as such between a group of areas with a common target. A second factor could be the identity  
566 of cells in the two streams. Comparison of the gene expression across species has revealed that  
567 some genes in rodents that are exclusively expressed in deep layers are expressed in the  
568 supragranular layers of primates (Zeng et al., 2012). Such changes in the laminar phenotype  
569 could perhaps occur across regions meaning that the layer 2 FB pathway in the prefrontal cortex  
570 may not correspond to the same identities as the FB pathway in extrastriate cortex.

571

## 572 **6. Functional characteristics of FF and FB pathways.**

573 In the present review we propose that cortical hierarchy can be gauged from the *nature*  
574 of the interactions between different brain areas, in the same manner that hierarchies in social  
575 networks reflect the nature of interactions between people. Crucially, our measure of  
576 hierarchical distance shows that SLN values of area pairs are highly consistent across multiple  
577 hierarchical levels. This consistency in conjunction with the known differences in oscillatory  
578 properties of laminar compartments of the cortex suggests that FF and FB interactions are not  
579 only anatomically distinct, but (i) use specific frequencies for communication and (ii) play  
580 specialized roles in cortical computation. Here we address how these functional properties  
581 relate to the detailed anatomical properties of FF and FB pathways.

582 As described above functional interactions between brain areas are distance dependent  
583 (Bastos et al., 2015b; D'Souza et al., 2016; Michalareas et al., 2016; Richter et al., 2018; van  
584 Kerkoerle et al., 2014). Granger-causality was used to quantify functional FF and FB  
585 interactions, thereby allowing the strength of these interactions to be quantified for individual  
586 frequency bands. Neuronal populations show spontaneous fluctuations over time that are driven  
587 by brain rhythms in different frequency bands, such as theta (3-8Hz), alpha (8-12Hz), beta (12-  
588 30Hz) and gamma (30-80Hz). As already noted above, neocortical rhythms do not comprise  
589 band-limited sinusoidal oscillation but typically describe noisy oscillations with energy in a  
590 wide frequency range (Burns et al., 2011; Spyropoulos et al., 2020). FF Granger-causality is  
591 particularly strong in the gamma-frequency band, while FB Granger is strong in the alpha and  
592 beta-frequency band (Bastos et al., 2015b; Michalareas et al., 2016; Richter et al., 2018; van  
593 Kerkoerle et al., 2014).

594 The finding that Granger-causality in the FF (FB) direction is strong in gamma  
595 (alpha/beta) frequencies is partially dictated by the cellular targets of inter-areal pathways. FF  
596 inputs target both excitatory and GABAergic interneurons (**Figure 12**). Importantly, the FF

597 projections to GABAergic interneurons target almost uniquely parvalbumin – PV interneurons,  
598 which are associated with gamma-frequency rhythms and respond to excitatory inputs with  
599 high temporal fidelity (Buzsaki and Wang, 2012; Cardin et al., 2009; Jouhanneau et al., 2018;  
600 Wang, 2010), and exhibit supra-threshold resonance at gamma-frequencies (Hasenstaub et al.,  
601 2005; Pike et al., 2000). Moreover FF projections skip the infragranular layers that are  
602 canonically associated with alpha and beta rhythms (Bollimunta et al., 2008; Buffalo et al.,  
603 2011; van Kerkoerle et al., 2014). By contrast, FB projections target multiple classes of  
604 GABAergic interneurons. Of these, somatostatin – SSt interneurons are associated with the  
605 generation of slower brain rhythms (Moore et al., 2010), and can directly influence activity of  
606 neurons in infragranular compartments, which are associated with alpha/beta rhythms.

607 Frequency-specific information transmission can also be predicted by the properties of  
608 the *sending* and *receiving* areas, so that the global distribution of brain rhythms across areas  
609 and layers contribute to the nature of functional interactions in the FF and FB directions.  
610 Gamma-rhythms are particularly strong in early visual areas *and* superficial layers (Bastos et  
611 al., 2015a; Buffalo et al., 2011; van Kerkoerle et al., 2014; Vinck and Bosman, 2016), whereas  
612 beta rhythms are most prominent in fronto-parietal areas *and* infragranular compartments  
613 (Bastos et al., 2015a; Buffalo et al., 2011). Consequently, one expects Granger-causal FF  
614 influences from early visual areas to parietal areas to be dominated by gamma frequencies,  
615 whereas FB influences to visual areas to be dominated by beta frequencies, in agreement with  
616 the fact that major long-range FF projections originate nearly exclusively from superficial  
617 layers, and FB from infragranular layers. Further, we note that gamma frequencies are generally  
618 associated with cortical activation, e.g. a visual stimulus or optogenetic activation, whereas  
619 alpha and beta frequencies are not clearly associated with a FF stimulus drive, consistent with  
620 the suggestion that FF provide the major driving influence (Covic and Sherman, 2011; De  
621 Pasquale and Sherman, 2011).

622 Above we hypothesized that these frequency specific channels constitute functional  
623 analogues of the SLN projections that we have quantified, leading to the expectation that they  
624 exhibit similar hierarchical properties. Bastos et al. (2015) defined the multiple Directed-  
625 influence Asymmetry Index (mDAI) based on the difference of gamma and theta vs beta  
626 frequency Granger-causality, obtained from ECoG recordings in macaque. mDAI enabled these  
627 authors to reconstruct hierarchies that closely resembled the structural hierarchy derived from  
628 SLN values. The feasibility of accounting for their data with the model that we presented above  
629 is demonstrated by the strong tendency of mDAI values corresponding to common projections  
630 to lie along lines of unit slope (**Figure 13**). The mDAI index is already on a scale that appears

631 to show the consistency necessary to apply the model, so the hierarchical values could be  
632 estimated from the incidence matrix in a global fashion, as described above, rather than by the  
633 averaging method used by Bastos et al. (2015).

634 Future work will need to specifically address the nature of layer-specific functional  
635 interactions for individual FF and FB projections. The dual counterstream architecture  
636 postulates that a prominent short-range FB projection originates from L2 in the higher area.  
637 Consequently, we predict that FB from L2 is particularly strong at gamma-frequencies.  
638 Likewise, L5 is postulated to have a short-range FF projection, and to exhibit strong oscillations  
639 at alpha/beta frequencies. Hence, based on the dual counterstream architecture we predict a  
640 greater diversity of functional interactions than suggested by previous work, the elucidation of  
641 which will require multi-layer high-density recording across multiple cortical areas.

642

### 643 **7. The predictive brain and the importance of topdown generative networks.**

644 A large body of physiological studies has shown that FF pathways ascending the  
645 hierarchy generate increasingly complex representations of the world in higher areas, leading  
646 to the large range of receptive field properties observed at different levels of the hierarchy.  
647 Thus, at its core, convergent FF projections carry information from the outside world, and allow  
648 this information to be gradually transformed to low-dimensional representations that can be  
649 exploited for behavior. In this respect, it is worthwhile noting that the recent success of deep  
650 neural network architectures in solving complex tasks similarly demonstrates the power of FF  
651 transformations in computation (LeCun et al., 2015; Richards et al., 2019) e.g. by forming  
652 increasingly complex representations along the feedforward hierarchy in convolutional  
653 networks (Yamins and DiCarlo, 2016).

654 In contrast to FF-pathways, the neurobiology of the twice as numerous FB pathways  
655 (Markov et al., 2014a) remains elusive, forming a major impediment to understanding the brain.  
656 A clearly defined role of FB connections is proposed for attentional modulation, but FB  
657 pathways are likely critical in a host of complex operations including: the comparison of  
658 internally generated predictions of sensory input with actual inputs; imagining sensory-like  
659 representations from concepts of e.g. visual objects; carrying out mental simulations and finally  
660 gating synaptic plasticity. An early conceptualization of hierarchical processing in the cortex  
661 conceived of FF pathways as driving target areas, whereas FB pathways would merely exert a  
662 modulatory influence (Klink et al., 2017); some researchers, however, proposed a more  
663 nuanced view (Bastos et al., 2012). Indeed, the simple dichotomy of the roles of FF and FB  
664 pathways is difficult to reconcile with the multiple physiological effects that are imputed to FB

665 control. For example, in the case of perceptual completion (e.g. in illusory figures) or visual  
666 imagination, FB is usually conceived to *enhance* neural activity; by contrast in the case of  
667 filtering out self-generated sensory inputs, FB activity is expected to *suppress* neural activity.  
668 These forms of enhancement and suppression represent essentially distinct computational  
669 operations: a central concept is that of *gain modulation*, where an existing sensory  
670 representation is preserved, but in essence multiplied or divided, as in attentional mechanisms  
671 (McAdams and Maunsell, 1999). However, in the case of imagery, one expects FB to “*write-*  
672 *in*” a pattern of neural activity, i.e. operate a *driving* process, or alternatively selectively  
673 modulate the activity of specific spontaneously active cell assemblies. In the case of *cancelling*  
674 *out* self-generated sensory inputs through FB (as in self-tickling), FB activity is thought to be  
675 *subtractive* (Bastos et al., 2012). Finally, FB activity has been conceived to mediate *error*  
676 signals, playing a key role in shaping perceptual learning and synaptic plasticity. The notion of  
677 FB as a “swiss-army-knife” contrasts with FF processing which is essentially homogeneous  
678 and driving, as captured by the architecture of deep neural networks. These considerations  
679 underline the diversity of FB processes, which could be mediated by distinct neural circuits. In  
680 particular, we hypothesize that laminar and distance-determined diversity of FB pathways will  
681 exhibit anatomo-functional properties that characterize the cortical circuits underlying the  
682 diverse global influences engaged in different cognitive functions. Given the diversity of FB  
683 pathways, and the many functions in which FB is implicated, it is a daunting task to develop a  
684 unified theory of the function of cortical FB. Yet, our understanding of the brain depends  
685 crucially on the development of precise theories of cortical FB.

686         The core feature of FB that distinguishes them from FF is that their projections are more  
687 divergent; i.e. they project from few to many neurons. Interestingly, divergent projections are  
688 a core feature of the most popular kind of artificial neural network architectures, which are also  
689 rapidly becoming a mainstream model of sensory processing in the brain (LeCun et al., 2015;  
690 Richards et al., 2019). In FF (deep) neural networks, divergent error signals lead to an  
691 adjustment of synaptic weights of FF projections (“backprop”). In other words, in FF (deep)  
692 neural networks, the exclusive role of FB is to improve the data transformations implemented  
693 by the FF projections. For a biological organism, error signals could be provided for instance  
694 by multi-sensory signals or reward signals. However, it is an open question as to how FB would  
695 be able to adjust synaptic weights of FF projections (Whittington and Bogacz, 2019). A  
696 candidate pathway is the multiple FB projections converging onto layer 1 (Cauller, 1995). Here  
697 FB projections impact the distal dendrites of pyramidal neurons, activating non-linear NMDA-  
698 R-dependent dendritic integration mechanisms and voltage-gated calcium channels. A recent

699 study provides evidence that top-down FB to layer 1 might indeed be involved in perceptual  
700 learning in a primary sensory area: With reward reinforcement, mice rapidly learn a behavioral  
701 task in which their response is contingent on electric-current stimulation of S1. However, when  
702 layer 1 projections from perirhinal cortex to S1 are inhibited, mice fail to learn the same task,  
703 suggesting that top-down FB is instructive for learning (Doron et al., 2019). Another candidate  
704 pathway to modulate plasticity is the FB projection to VIP+ and SOM+ interneurons, given that  
705 SOM+ neurons can gate plasticity on the dendrites of pyramidal neurons (Batista-Brito et al.,  
706 2018).

707       Until very recently the dominant theory of brain function was that sensory information  
708 progressing up the cortical hierarchy undergoes successive abstractions generating increasingly  
709 complex receptive fields. In this feedforward processing model of cortex function, the  
710 characterization of the receptive fields at different levels of the hierarchy has been a  
711 neuroscience success story over the past 60 years (Hubel and Wiesel, 1962). The bottom up  
712 sensory processing driving receptive field elaboration leads to the notion of the importance of  
713 single neurons coding for perceptually significant features. According to this feature detection  
714 view the cortical hierarchy will house neurons ranging from edge detectors to the proverbial  
715 grandmother neurons (Martin, 1994). However, in recent years there has been a paradigm shift  
716 in cognitive neuroscience that takes account of the inherent uncertainty of the nature of the  
717 sensory input to the brain. In this view which goes back to Helmholtz and was later championed  
718 by Richard Gregory, making sense of input from the sensorium requires knowledge of the  
719 world, which allows the brain to develop hypotheses of the world that are tested against sensory  
720 evidence (Friston, 2010; Gregory, 1997). These hypotheses can be formalized as Bayesian  
721 inferences on the causes of our sensation and how these inferences induce perception and  
722 behavior (Dayan et al., 1995; Lee and Mumford, 2003). The implementation of inference in the  
723 cortex has more recently been recast in terms of the circuits underlying the hierarchical  
724 processing that formulate generative statistical models as predictive processing (Clark, 2013;  
725 de Lange et al., 2018; Friston, 2010; Keller and Mrsic-Flogel, 2018; Rao and Ballard, 1999).

726       According to the predictive processing model the brain possesses a model of the world  
727 that it seeks to optimize using sensory inputs. Predictive processing postulates that the prior  
728 information that resides at the different levels of the cortical hierarchy generate descending  
729 predictions that cascade down the cortical hierarchy, allowing interaction with bottom up  
730 information ascending the hierarchy. At each level of the hierarchy the interaction between the  
731 top-down predictions and the ascending input from the sensorium is such that only the residual,  
732 unexplained sensory information (or prediction error) proceeds to the next level. The overall

733 outcome of the hierarchical process is prediction error minimization. Predictive processing  
734 constitutes an inversion of the classical feedforward model by proposing that descending  
735 feedback pathways provide representations of the external world, which modifies the ascending  
736 signal that now indicates aspects of the world that are unexpected. Given its radical nature  
737 impacting every aspect of cortical function, predictive processing has attracted considerable  
738 attention from experimentalists which have gone some way to providing empirical support  
739 (Bastos et al., 2012; Clark, 2013; de Lange et al., 2018; Keller and Mrsic-Flogel, 2018; Walsh  
740 et al., 2020).

741         Much of the complexity of predictive coding concerns the circuitry underlying the  
742 interaction of FF and FB streams and this area of research is still hotly debated (Keller and  
743 Mrsic-Flogel, 2018). However, little research has focused on testing how FB connections in  
744 the brain could serve as the substrate of a top-down generative network (Bastos et al., 2012;  
745 Hinton, 2007; Kosslyn, 1994; Mumford, 1992; Senden et al., 2019). In FF visual processing,  
746 high-dimensional sensory representations such as an image are sequentially transformed into  
747 low-dimensional representations such as object categories, represented at higher hierarchical  
748 levels. Conceivably FB pathways *invert* this process by generating high-dimensional  
749 representations starting from low-dimensional variables (Hinton, 2007). We refer to such  
750 pathways as top-down generative networks. Whereas the FF projections in convolutional  
751 networks create a convergence of information from many to few, in generative networks  
752 information is relayed by divergent projections from few to many. For instance, the perception  
753 of a red apple depends on a transformation of the image of a red apple (represented by many  
754 neurons) into high-level representations in the temporal lobe (represented by few neurons).  
755 However, if we imagine a red apple, processing should start from high-level representations  
756 (few neurons) and generate a low level neural representation of the image of a red apple  
757 (represented by many neurons).

758         Top-down generative networks may play distinct functional roles in several cognitive  
759 processes such as predictive processing, mental simulation, imagery or selective attention. An  
760 attractive aspect of the generative top-down network hypothesis is that all of these functions  
761 are subserved by a relatively small number of anatomical FB pathways implementing a  
762 function-specific generative network. This network would then interact with distinct cellular  
763 components in individual target areas, thereby differentially impacting ongoing ascending FF  
764 activity in distinct pathways. As an example, we can take the processes of *imagination*,  
765 *expectancy and attention*. In the case of expectancy (e.g. walking to the kitchen and expecting  
766 to see a red apple in the fruit basket, but not in the sink), generative networks may cause a

767 reduction of neural response to an expected stimulus, whereas that to surprising stimuli would  
768 not be suppressed by top-down predictions. In the case of attention (e.g. searching for a red  
769 apple in the kitchen), generative networks may lead to an amplification of sensory activity when  
770 we find the stimulus that we were seeking. In the case of *imagination* (e.g. thinking of a red  
771 apple), generative networks would drive activity in lower areas based on the activation of  
772 neurons in higher areas in the absence of any sensory stimulation. Since high-level brain areas  
773 contain abstract representations of objects, how do the feedback pathways of the brain achieve  
774 the remarkable feat of generating concrete sensory representations in the mind's eye during  
775 mental imagery? An apple is an abstract concept, yet we can generate concrete instantiations of  
776 apples by imagining for example, a Pink Lady or a green Granny Smith apple on a real or an  
777 imagined table in front of us. Remarkably, we are also not limited to imagining objects as we  
778 usually see them –it is equally possible for us to imagine a red apple that is as big as a football!  
779 Remarkably, we can generate sensory experiences in environments of which we have no  
780 experience, such as standing on Mars staring out through our space helmet at the red colored  
781 landscape in front of us. These examples illustrate a cornerstone of our hypothesis: that  
782 generative networks are competent to transform abstract concepts into concrete sensory-like  
783 representations in our mind's eye.

784 Strong experimental support for top-down generative networks comes from findings in  
785 human imaging experiments showing that imagined objects lead to corresponding spatial  
786 temporal activation of area V1 (Emmerling et al., 2016; Naselaris et al., 2015; Senden et al.,  
787 2019; Thirion et al., 2006). The activation of the top-down pathway is coherent with predictive  
788 processing theory where FB pathways shape the FF pathway but not the inverse. These findings  
789 of top-down generative networks creating a sensory-like representation in early visual areas  
790 could be a particularity of the human brain, thereby providing the substrate for enhanced visual  
791 imagery supporting simulation and imagination. However, this appears not to be the case; a  
792 recent breakthrough publication from the Roelfsema lab revealed spiking activity in area V1 of  
793 a macaque with respect to an object held in working memory (van Kerkoerle et al., 2017),  
794 suggesting that the fMRI activation patterns reported in human experiments could correspond  
795 to spiking activity generated by visual imagery of imagined objects (Emmerling et al., 2016;  
796 Hinton, 2007; Naselaris et al., 2015; Senden et al., 2019; Thirion et al., 2006).

797 The dual counterstream architecture (see Section 5) suggests several features that are  
798 congruent with the hypothesis of top-down generative networks: (1) the convergence of cortical  
799 FF connections in the sensory stream is mirrored by the divergence of FB connections; (2)  
800 source populations of FF and FB pathways are completely separate, which has been recognized



801 as a key requirement enabling distinct functionalities of generative top-down networks (Friston,  
802 2018; Markov and Kennedy, 2013; Markov et al., 2014b; Shipp, 2016) (3) on average  
803 throughout the cortex there are twice as many FB pathways than FF projections to a given area.  
804 Studies in which human subjects are cued to generate a sensory percept also provide evidence  
805 for top-down generative networks in the cortex (Emmerling et al., 2016; Naselaris et al., 2015;  
806 Senden et al., 2019; Slotnick et al., 2005; Thirion et al., 2006).

807 Examining the dual counterstream suggests a possible division of labor between layer 2  
808 and 6 FB projections: Layer 2 FB and layer 3 FF projections exhibit common features that  
809 distinguish them from layer 6 FB. Layer 2 FB and layer 3 FF are short distance, topographically  
810 organized and exhibit low rates of bifurcation; contrasting with layer 6 FB which are long-  
811 distance, diffuse and have high rates of bifurcation. Thus, the layer 2 FB system may mirror the  
812 layer 3 FF system and implement a generative top-down network in which high-dimensional  
813 sensory representations can be generated through sequential stages, starting from higher brain  
814 areas. The layer 6 FB pathway, on the other hand, may determine the way in which the layer 2  
815 generative network interacts with the local microcircuit, sending contextual signals that reflect  
816 behavioral goals and reward signals. Based on this reasoning, we hypothesize that layer 6 FB  
817 has more modulatory effects that it exerts, for example, via targeting the apical layer 1 dendrites  
818 as well as GABAergic interneurons such as SOM+ and VIP+ interneurons that modulate the  
819 activity of local pyramidal neurons (Batista-Brito et al., 2018). Testing this hypothesis will  
820 require parallel anatomical and physiological investigations. Optogenetic techniques in non-  
821 human primates could allow the injection of precise spatiotemporal activation patterns into  
822 specific laminar compartments of higher brain areas, combined with physiological  
823 measurements of activity in lower brain areas.

824

## 825 **Box 1**

### 826 **Experimental Exploration of the Dual Counterstream Architecture.**

#### 827 **Dual counterstream features**

#### **Functional and structural correlates**

|                                                                                                                                                                                                                                                                                                                                                                                                               |                                                                                                                                                                                                                                                                         |
|---------------------------------------------------------------------------------------------------------------------------------------------------------------------------------------------------------------------------------------------------------------------------------------------------------------------------------------------------------------------------------------------------------------|-------------------------------------------------------------------------------------------------------------------------------------------------------------------------------------------------------------------------------------------------------------------------|
| <i>(1) Source populations of FF and FB pathways are completely separate, which has been recognized as a key requirement enabling distinct functionalities of generative top-down networks (Friston, 2018). A core feature of the dual counterstream architecture is that despite the ubiquity of bifurcation (Kennedy and Bullier, 1985), in no layer do individual neurons in FF and FB pathways possess</i> | Molecular characterization of FF and FB neurons is very much on the agenda. This would lead to the development of markers of these two projection types and hold the promise of the development of genetic tools for independent manipulation of different FB pathways. |
|---------------------------------------------------------------------------------------------------------------------------------------------------------------------------------------------------------------------------------------------------------------------------------------------------------------------------------------------------------------------------------------------------------------|-------------------------------------------------------------------------------------------------------------------------------------------------------------------------------------------------------------------------------------------------------------------------|

|                                                                                                                                                                                                                                                                                                                                                                                                                                                                                                                                                                                                                                                                                                                                                                                                                                                                                                                                                                         |                                                                                                                                                                                                                                                                                                                                                                                                                                                                                                                                                                                                                                                                                                                                                                                                                                                                                                                                                                                                                                                                         |
|-------------------------------------------------------------------------------------------------------------------------------------------------------------------------------------------------------------------------------------------------------------------------------------------------------------------------------------------------------------------------------------------------------------------------------------------------------------------------------------------------------------------------------------------------------------------------------------------------------------------------------------------------------------------------------------------------------------------------------------------------------------------------------------------------------------------------------------------------------------------------------------------------------------------------------------------------------------------------|-------------------------------------------------------------------------------------------------------------------------------------------------------------------------------------------------------------------------------------------------------------------------------------------------------------------------------------------------------------------------------------------------------------------------------------------------------------------------------------------------------------------------------------------------------------------------------------------------------------------------------------------------------------------------------------------------------------------------------------------------------------------------------------------------------------------------------------------------------------------------------------------------------------------------------------------------------------------------------------------------------------------------------------------------------------------------|
| <p>both up and downstream collaterals (Markov et al., 2014b). Similar findings hold for mouse (Berezovskii et al., 2011). This indicates that FF and FB cells indeed constitute distinct populations.</p>                                                                                                                                                                                                                                                                                                                                                                                                                                                                                                                                                                                                                                                                                                                                                               |                                                                                                                                                                                                                                                                                                                                                                                                                                                                                                                                                                                                                                                                                                                                                                                                                                                                                                                                                                                                                                                                         |
| <p>(2) <i>Large variability in the laminar configuration of FB pathways.</i> FF connections are highly stereotypical, while FB projections show a large variability in their laminar origins and targets. Retrograde tracer in a midlevel target area labels up- and downstream areas with different proportions of supragranular neurons according to their hierarchical distance (<b>Figure 10C</b>). These laminar distributions of FF and FB neurons constitute their signatures that allow areas to be ranked in the Felleman and Van Essen hierarchy. Importantly, the different signatures of hierarchical distance reflect the changing laminar composition of the long-distance inputs to an area, meaning that “hierarchy” refers to the distance-dependent laminar-constrained integration of FF and FB inputs (Barone et al., 2000; Markov et al., 2014b) and signals (Bastos et al., 2015b; Michalareas et al., 2016) into the canonical microcircuit.</p> | <p>The multiplicity of the FB pathways in terms of laminar origins and targets over different distances suggest that compared to the singularity of FF pathways, individual FB pathways come in different flavors and fulfill different functions. These different FB pathways need to be investigated in human and non-human primates (NHP) in high-field, laminar resolution fMRI and in parallel using invasive electrophysiology in NHP. These functional investigations are of particular relevance to the supragranular counterstream given the unique features of the Primate supragranular layers which are generated by a primate-specific germinal zone (OSVZ) (Smart et al., 2002), that exhibits complex cell lineages (Lukaszewicz et al., 2005) that we have hypothesized generate unique cell features in primates (Dehay et al., 2015; Harris and Shepherd, 2015). These considerations support the notion that the two FB pathways (one in the supra- and one in infragranular layers) will have distinct functional roles in generative networks.</p> |
| <p>(3) <i>FB and FF are not serially organized.</i> Computational modeling studies e.g. (Bastos et al., 2012) invariably assume a serial hierarchical organization (<b>Figure 10C</b>) whereas in fact most areas receive and project to most other areas (Markov et al., 2014b).</p>                                                                                                                                                                                                                                                                                                                                                                                                                                                                                                                                                                                                                                                                                   | <p>The non-serial nature of inter-areal connectivity raises difficulty for ongoing attempts at large-scale computational modeling that needs to be given further attention.</p>                                                                                                                                                                                                                                                                                                                                                                                                                                                                                                                                                                                                                                                                                                                                                                                                                                                                                         |
| <p>(5) <i>Lamination</i> The dual counterstream architecture explicitly links pathways to layers, which is in-line with the increasing importance attached to cortical lamination and connectivity (Senzai et al., 2019). (1): effects on topography of FB. In addition to the low divergence-convergence values of supragranular layers (L2 FB and L3FF), and the high divergence-convergence values of infragranular layers (L5 FF and L6FB), high-rates of bifurcation by L6/L5 ensures innervation of multiple areas contrasting with and low levels of bifurcation by L2/L3 neurons (Kennedy and Bullier, 1985).</p>                                                                                                                                                                                                                                                                                                                                               | <p>There are two interrelated issues here. Present understating of inter-areal connectivity in NHP, crucially lacks insight into the laminar restricted connectivity of these pathways. This requires using viral tracers in order to obtain precise information on the connectivity of individual pathways over different distances.</p>                                                                                                                                                                                                                                                                                                                                                                                                                                                                                                                                                                                                                                                                                                                               |

|                                                                                                                                                                                                                                                                                                                                                                                                                                                                                                                                                              |                                                                                                                                                                                                                                                   |
|--------------------------------------------------------------------------------------------------------------------------------------------------------------------------------------------------------------------------------------------------------------------------------------------------------------------------------------------------------------------------------------------------------------------------------------------------------------------------------------------------------------------------------------------------------------|---------------------------------------------------------------------------------------------------------------------------------------------------------------------------------------------------------------------------------------------------|
| <p>(6) <i>Differences of FB and FF targets.</i> The L3 FF projections primarily target upstream interneurons in L4. Presently we do not know the cellular targets of L2 FB projections although there is some suggestion that they could principally target L2 FB neurons in downstream areas, leading to long inter-areal FB chains. In parallel with differences in FF and FB cellular targets, do the cell targets change (and how) as a function of connection distance, possibly bringing a solution to addressing the problem raised in point (3)?</p> | <p>Laminar restricted connectivity to different cell types needs to be investigated in rodents and primates using next generation of viral tracers.</p>                                                                                           |
| <p>(7) <i>FB show distinct development strategies.</i> Differences in functionality are expected to require different developmental programs, which is indeed the case for FF and FB pathways. FF pathways develop precociously and exhibit directed-growth; FB pathway formation is delayed well into the postnatal period and exhibits diffuse growth followed by pruning (Barone et al., 1995; Barone et al., 1996; Kennedy et al., 1989).</p>                                                                                                            | <p>These observations invite the investigation of inter-areal processing in NHP at different developmental periods and suggest that high-field, laminar resolution fMRI in infants and adults could reveal important developmental processes.</p> |

828

## 829 **9. Conclusion and speculations.**

830 We have shown that cortical hierarchy can be defined by connectivity gradients and the  
831 functional correlates of these gradients. In other words, inputs to a cortical area sample the  
832 cortical sheet in a principled manner defined by the differential space constants of the distance  
833 rules governing the individual cortical layers. This approach to understanding hierarchy is  
834 anchored in the recognition that it is the activity and connectivity linking neurons across the  
835 cortex that will ultimately reveal the process underlying the dynamics of cortical function. Link  
836 based investigation is complemented by characterization of the nodes. Helen Barbas has  
837 championed the structural model, which shows that laminar differentiation allows hierarchical  
838 ranking of cortical areas that correlates well with connectivity patterns (Barbas, 2015). The  
839 structural model is of particular interest because it allows ranking of cortical areas via gradual  
840 variations of cytoarchitecture and myeloarchitecture (Sanides, 1972), and has opened the  
841 interpretation of large-scale models of the cortex to investigation with non-invasive imaging  
842 techniques that can be applied to the human brain (Burt et al., 2018; Margulies et al., 2016;  
843 Paquola et al., 2019).

844 The central argument of this review is that cortical hierarchy can be usefully thought of  
845 as the gradual changes in the cortical input requirements of the local cortical circuit that in terms  
846 of synaptic mass constitutes the powerhouse of the cortex. Understanding the cellular

847 mechanisms underlying hierarchical processing require investigations of hierarchy in terms of  
848 the laminar restricted connectivity and physiology that we have advocated in this review and  
849 described in Box 1. It is nearly 15 years since Jean Bullier posed the question “What is fed  
850 back?” (Bullier, 2006). The multiplicity of FB pathways and the complexity of their proposed  
851 functions were deep issues that he felt needed to be addressed. In the last 14 years there has  
852 been a spectacular development of three classes of techniques that now allow us to address Jean  
853 Bullier’s question. Firstly, optogenetics holographic stimulation makes it possible to address  
854 causation (Carrillo-Reid et al., 2019; Marshel et al., 2019), thereby addressing how activation  
855 of a given FB pathway influences a particular cognitive task. Secondly, viral tracing allows  
856 cell-type and laminar-constrained connectivity (El-Shamayleh et al., 2016; Nassi et al., 2015;  
857 Siu et al., 2020) making it possible to resolve the dual counterstream architecture. Thirdly, high-  
858 resolution fMRI allows laminar and columnar resolution imaging in the human brain e.g.  
859 (Kemper et al., 2018); furthermore, recent advances in MR methods and data analysis enable  
860 investigation of directional laminar connectivity in hierarchical brain networks (Huber et al.,  
861 2020). The key feature of future investigation will be to examine FB modulation of cognitive  
862 tasks in animal models that can, in parallel, be applied in humans where perceptual  
863 consequences can be reported (Kok et al., 2016; Schneider et al., 2019). These combined  
864 approaches will address the complexity of the interaction of descending generative networks  
865 with the local microcircuit. Interpreting the data coming out of these experiment in terms of  
866 cortical dynamics will require computational modeling of the interactions of these top-down  
867 effects with the canonical microcircuit using approaches developed by Maass (Haeusler and  
868 Maass, 2007).

869 The interactions of descending with ascending pathways required by predictive  
870 processing theory will be largely in supragranular cortical layers, which have been shown to be  
871 a major target for human evolutionary adaptation (Heide et al., 2020; Won et al., 2019). The  
872 evolutionary expansion of the supragranular layers is accompanied by an increase in  
873 heterogeneity of glutamergic cell-types in terms of morphology, electrophysiology and gene  
874 expression going from rodent to human (Berg et al., 2020) in turn supporting a complexification  
875 of the circuits in these layers (Hodge et al., 2019). The amplification and diversification of  
876 supragranular intratelencephalic-projecting neurons in primates suggest that the investigation  
877 of the biology of the generative networks advocated here may well exploit reductionist  
878 approaches in the rodent model, but will need nonetheless to be studied with a particular  
879 emphasis on human and non-human primates.

880 Finally, the observation that top-down networks generate sensory-like activity in low  
881 levels of the cortical hierarchy in the *absence* of sensory input raises interesting issues of  
882 representation in the brain. According to predictive coding theory, sensory perception requires  
883 predicting the present. These top-down generative networks can be important for predicting or  
884 simulating the future (Grezes and Decety, 2001), in interplay with the hippocampus (Buckner,  
885 2010; Kay et al., 2020), as well as revisiting the past allowing for instance the mind's eye to  
886 scrutinize detail in visual images (Kosslyn, 1994). In this way the top-down generative  
887 networks could have much to do with what we call thinking. In addition these networks would  
888 support an integral aspect of human consciousness, namely the seamless and continuous  
889 navigation of the mental narrative of self across past, present and future (Jaynes, 1976;  
890 Nørretranders, 1991). Importantly, the observation that these networks are active in the NHP  
891 (van Kerkoerle et al., 2017), indicates that we can now plan experimental investigation of their  
892 integrative neurobiology at the cellular level.

893

#### 894 **Acknowledgments.**

895 We would like to thank Kevan Martin and Rodney Douglas for numerous and often passionate  
896 discussions on some of the central issues discussed here and for their thoughtful comments on  
897 the text, as well as Stewart Ship for his deep insight. Funding gratefully acknowledged by XJW  
898 (ONR Grant N00014-17-1-2041, US National Institutes of Health NIH grant 062349, Simons  
899 Collaboration on the Global Brain program grant 543057SPI) ; KK (DUAL\_STREAM ANR-  
900 19-CE37-0025); MV (ERC Starting Grant SPATEMP, BMF BINDA-031L0167); HK  
901 (LABEX CORTEX ANR-11-LABX-0042; Université de Lyon ANR-11-IDEX-0007),  
902 A2P2MC ANR-17-NEUC-0004, CORTICITY ANR-17-HBPR-0003, SCUSI, Région  
903 Auvergne-Rhône-Alpes 1700933701, FRC APE13 “Rotary-Espoir en Tête”.

904

905 **Author contribution.** Data acquisition JV, LM, HK; Analysis of data JV, LM, KK, HK;  
906 Statistical modeling of hierarchy KK; All authors conjointly wrote the first draft and revised  
907 and edited the completed document; Proposed the study MV, HK

908

#### 909 **References**

910

911 Ardid, S., Wang, X.J., 2013. A tweaking principle for executive control: neuronal circuit  
912 mechanism for rule-based task switching and conflict resolution. *J Neurosci* 33, 19504-  
913 19517.

- 914 Armstrong, K.M., Fitzgerald, J.K., Moore, T., 2006. Changes in visual receptive fields with  
915 microstimulation of frontal cortex. *Neuron* 50, 791-798.
- 916 Badre, D., D'Esposito, M., 2007. Functional magnetic resonance imaging evidence for a  
917 hierarchical organization of the prefrontal cortex. *J Cogn Neurosci* 19, 2082-2099.
- 918 Badre, D., D'Esposito, M., 2009. Is the rostro-caudal axis of the frontal lobe hierarchical? *Nat*  
919 *Rev Neurosci* 10, 659-669.
- 920 Barbas, H., 2015. General cortical and special prefrontal connections: principles from structure  
921 to function. *Annu Rev Neurosci* 38, 269-289.
- 922 Barone, P., Batardiere, A., Knoblauch, K., Kennedy, H., 2000. Laminar distribution of neurons  
923 in extrastriate areas projecting to visual areas V1 and V4 correlates with the hierarchical  
924 rank and indicates the operation of a distance rule. *J Neurosci* 20, 3263-3281.
- 925 Barone, P., Dehay, C., Berland, M., Bullier, J., Kennedy, H., 1995. Developmental remodeling  
926 of primate visual cortical pathways. *Cereb Cortex* 5, 22-38.
- 927 Barone, P., Dehay, C., Berland, M., Kennedy, H., 1996. Role of directed growth and target  
928 selection in the formation of cortical pathways: prenatal development of the projection of  
929 area V2 to area V4 in the monkey. *J Comp Neurol* 374, 1-20.
- 930 Barth, A.L., Poulet, J.F., 2012. Experimental evidence for sparse firing in the neocortex. *Trends*  
931 *Neurosci* 35, 345-355.
- 932 Bastos, A.M., Litvak, V., Moran, R., Bosman, C.A., Fries, P., Friston, K.J., 2015a. A DCM  
933 study of spectral asymmetries in feedforward and feedback connections between visual  
934 areas V1 and V4 in the monkey. *Neuroimage* 108, 460-475.
- 935 Bastos, A.M., Loonis, R., Kornblith, S., Lundqvist, M., Miller, E.K., 2018. Laminar recordings  
936 in frontal cortex suggest distinct layers for maintenance and control of working memory.  
937 *Proc Natl Acad Sci U S A* 115, 1117-1122.
- 938 Bastos, A.M., Usrey, W.M., Adams, R.A., Mangun, G.R., Fries, P., Friston, K.J., 2012.  
939 Canonical microcircuits for predictive coding. *Neuron* 76, 695-711.
- 940 Bastos, A.M., Vezoli, J., Bosman, C.A., Schoffelen, J.M., Oostenveld, R., Dowdall, J.R., De  
941 Weerd, P., Kennedy, H., Fries, P., 2015b. Visual Areas Exert Feedforward and Feedback  
942 Influences through Distinct Frequency Channels. *Neuron* 85, 390-401.
- 943 Batista-Brito, R., Zaghera, E., Ratliff, J.M., Vinck, M., 2018. Modulation of cortical circuits by  
944 top-down processing and arousal state in health and disease. *Curr Opin Neurobiol* 52,  
945 172-181.
- 946 Berezovskii, V.K., Nassi, J.J., Born, R.T., 2011. Segregation of feedforward and feedback  
947 projections in mouse visual cortex. *J Comp Neurol* 519, 3672-3683.

948 Berg, J., Sorensen, S.A., Ting, J.T., Miller, J.A., Chartrand, T., Buchin, A., Bakken, T.E.,  
949 Budzillo, A., Dee, N., Ding, S.-L., Gouwens, N.W., Hodge, R.D., Kalmbach, B., Lee, C.,  
950 Lee, B.R., Alfiler, L., Baker, K., Barkan, E., Beller, A., Berry, K., Bertagnolli, D.,  
951 Bickley, K., Bomben, J., Braun, T., Brouner, K., Casper, T., Chong, P., Crichton, K.,  
952 Dalley, R., de Frates, R., Desta, T., Dingman Lee, S., D’Orazi, F., Dotson, N., Egdorf,  
953 T., Enstrom, R., Farrell, C., Feng, D., Fong, O., Furdan, S., Galakhova, A.A., Gamlin, C.,  
954 Gary, A., Glandon, A., Goldy, J., Gorham, M., Goriounova, N.A., Gratiy, S., Graybuck,  
955 L., Gu, H., Hadley, K., Hansen, N., Heistek, T.S., Henry, A.M., Heyer, D.B., Hill, D.,  
956 Hill, C., Hupp, M., Jarsky, T., Kebede, S., Keene, L., Kim, L., Kim, M.-H., Kroll, M.,  
957 Latimer, C., Levi, B.P., Link, K.E., Mallory, M., Mann, R., Marshall, D., Maxwell, M.,  
958 McGraw, M., McMillen, D., Melief, E., Mertens, E.J., Mezei, L., Mihut, N., Mok, S.,  
959 Molnar, G., Mukora, A., Ng, L., Ngo, K., Nicovich, P.R., Nyhus, J., Olah, G., Oldre, A.,  
960 Omstead, V., Ozsvar, A., Park, D., Peng, H., Pham, T., Pom, C.A., Potekhina, L.,  
961 Rajanbabu, R., Ransford, S., Reid, D., Rimorin, C., Ruiz, A., Sandman, D., Sulc, J.,  
962 Sunkin, S.M., Szafer, A., Szemenyei, V., Thomsen, E.R., Tieu, M., Torkelson, A., Trinh,  
963 J., Tung, H., Wakeman, W., Ward, K., Wilbers, R., Williams, G., Yao, Z., Yoon, J.-G.,  
964 Anastassiou, C., Arkhipov, A., Barzo, P., Bernard, A., Cobbs, C., de Witt Hamer, P.C.,  
965 Ellenbogen, R.G., Esposito, L., Ferreira, M., Gwinn, R.P., Hawrylycz, M.J., Hof, P.R.,  
966 Idema, S., Jones, A.R., Keene, C.D., Ko, A.L., Murphy, G.J., Ng, L., Ojemann, J.G.,  
967 Patel, A.P., Phillips, J.W., Silbergeld, D.L., Smith, K., Tasic, B., Yuste, R., Segev, I., de  
968 Kock, C.P.J., Mansvelder, H.D., Tamas, G., Zeng, H., Koch, C., Lein, E.S., 2020. Human  
969 cortical expansion involves diversification and specialization of supragranular  
970 intratelencephalic-projecting neurons. *bioRxiv*, 2020.2003.2031.018820.

971 Betizeau, M., Cortay, V., Patti, D., Pfister, S., Gautier, E., Bellemin-Menard, A., Afanassieff,  
972 M., Huissoud, C., Douglas, R.J., Kennedy, H., Dehay, C., 2013. Precursor diversity and  
973 complexity of lineage relationships in the outer subventricular zone (OSVZ) of the  
974 primate. *Neuron* 80, 442-457.

975 Binzegger, T., Douglas, R.J., Martin, K.A., 2004. A quantitative map of the circuit of cat  
976 primary visual cortex. *J Neurosci* 24, 8441-8453.

977 Binzegger, T., Douglas, R.J., Martin, K.A., 2009. Topology and dynamics of the canonical  
978 circuit of cat V1. *Neural Netw* 22, 1071-1078.

979 Bollimunta, A., Chen, Y., Schroeder, C.E., Ding, M., 2008. Neuronal mechanisms of cortical  
980 alpha oscillations in awake-behaving macaques. *J Neurosci* 28, 9976-9988.

- 981 Bonnefond, M., Kastner, S., Jensen, O., 2017. Communication between Brain Areas Based on  
982 Nested Oscillations. *eNeuro* 4.
- 983 Brovelli, A., Ding, M., Ledberg, A., Chen, Y., Nakamura, R., Bressler, S.L., 2004. Beta  
984 oscillations in a large-scale sensorimotor cortical network: directional influences revealed  
985 by Granger causality. *Proc Natl Acad Sci U S A* 101, 9849-9854.
- 986 Buckner, R.L., 2010. The role of the hippocampus in prediction and imagination. *Annu Rev*  
987 *Psychol* 61, 27-48, C21-28.
- 988 Buffalo, E.A., Fries, P., Landman, R., Buschman, T.J., Desimone, R., 2011. Laminar  
989 differences in gamma and alpha coherence in the ventral stream. *Proc Natl Acad Sci U S*  
990 *A* 108, 11262-11267.
- 991 Bullier, J., 2006. What is Fed Back? In: van Hemmen, J.L., Sejnowski, T.J. (Eds.), *23 Problems*  
992 *in Systems Neuroscience*. Oxford University Press USA, pp. 103-132.
- 993 Burns, S.P., Xing, D., Shapley, R.M., 2011. Is gamma-band activity in the local field potential  
994 of V1 cortex a "clock" or filtered noise? *J Neurosci* 31, 9658-9664.
- 995 Burt, J.B., Demirtaş, M., Eckner, W.J., Navejar, N.M., Ji, J.L., Martin, W.J., Bernacchia, A.,  
996 Anticevic, A., Murray, J.D., 2018. Hierarchy of transcriptomic specialization across  
997 human cortex captured by structural neuroimaging topography. *Nat Neurosci* 21, 1251-  
998 1259.
- 999 Buzsaki, G., Wang, X.J., 2012. Mechanisms of gamma oscillations. *Annu Rev Neurosci* 35,  
1000 203-225.
- 1001 Cahalane, D.J., Charvet, C.J., Finlay, B.L., 2014. Modeling local and cross-species neuron  
1002 number variations in the cerebral cortex as arising from a common mechanism. *Proc Natl*  
1003 *Acad Sci U S A* 111, 17642-17647.
- 1004 Cardin, J.A., Carlen, M., Meletis, K., Knoblich, U., Zhang, F., Deisseroth, K., Tsai, L.H.,  
1005 Moore, C.I., 2009. Driving fast-spiking cells induces gamma rhythm and controls sensory  
1006 responses. *Nature* 459, 663-667.
- 1007 Carrillo-Reid, L., Han, S., Yang, W., Akrouh, A., Yuste, R., 2019. Controlling Visually Guided  
1008 Behavior by Holographic Recalling of Cortical Ensembles. *Cell* 178, 447-457 e445.
- 1009 Cauller, L., 1995. Layer I of primary sensory neocortex: where top-down converges upon  
1010 bottom-up. *Behav Brain Res* 71, 163-170.
- 1011 Chaudhuri, R., Knoblauch, K., Gariel, M.A., Kennedy, H., Wang, X.J., 2015. A Large-Scale  
1012 Circuit Mechanism for Hierarchical Dynamical Processing in the Primate Cortex. *Neuron*  
1013 88, 419-431.



- 1014 Choi, E.Y., Drayna, G.K., Badre, D., 2018. Evidence for a Functional Hierarchy of Association  
1015 Networks. *J Cogn Neurosci* 30, 722-736.
- 1016 Clark, A., 2013. Whatever next? Predictive brains, situated agents, and the future of cognitive  
1017 science. *Behav Brain Sci* 36, 181-204.
- 1018 Cossell, L., Iacaruso, M.F., Muir, D.R., Houlton, R., Sader, E.N., Ko, H., Hofer, S.B., Mrsic-  
1019 Flogel, T.D., 2015. Functional organization of excitatory synaptic strength in primary  
1020 visual cortex. *Nature*.
- 1021 Covic, E.N., Sherman, S.M., 2011. Synaptic properties of connections between the primary and  
1022 secondary auditory cortices in mice. *Cereb Cortex* 21, 2425-2441.
- 1023 Cragg, B.G., 1969. The topography of the afferent projections in the circumstriate visual cortex  
1024 of the monkey studied by the Nauta method. *Vision Res* 9, 733-747.
- 1025 Crick, F., Koch, C., 1998. Constraints on cortical and thalamic projections: the no-strong-loops  
1026 hypothesis. *Nature* 391, 245-250.
- 1027 Crochet, S., Poulet, J.F., Kremer, Y., Petersen, C.C., 2011. Synaptic mechanisms underlying  
1028 sparse coding of active touch. *Neuron* 69, 1160-1175.
- 1029 D'Souza, R.D., Meier, A.M., Bista, P., Wang, Q., Burkhalter, A., 2016. Recruitment of  
1030 inhibition and excitation across mouse visual cortex depends on the hierarchy of  
1031 interconnecting areas. *Elife* 5.
- 1032 D'Souza, R.D., Wang, Q., Ji, W., Meier, A.M., Kennedy, H., Knoblauch, K., Burkhalter, A.,  
1033 2020. Canonical and noncanonical features of the mouse visual cortical hierarchy.  
1034 bioRxiv, 2020.2003.2030.016303.
- 1035 da Costa, N.M., Martin, K.A., 2010. Whose Cortical Column Would that Be? *Front Neuroanat*  
1036 4, 16.
- 1037 Dayan, P., Hinton, G.E., Neal, R.M., Zemel, R.S., 1995. The Helmholtz machine. *Neural*  
1038 *Comput* 7, 889-904.
- 1039 de Lange, F.P., Heilbron, M., Kok, P., 2018. How Do Expectations Shape Perception? *Trends*  
1040 *Cogn Sci* 22, 764-779.
- 1041 De Pasquale, R., Sherman, S.M., 2011. Synaptic properties of corticocortical connections  
1042 between the primary and secondary visual cortical areas in the mouse. *J Neurosci* 31,  
1043 16494-16506.
- 1044 Dehay, C., Kennedy, H., Kosik, K.S., 2015. The Outer Subventricular Zone and Primate-  
1045 Specific Cortical Complexification. *Neuron* 85, 683-694.

- 1046 Doron, G., Shin, J.N., Takahashi, N., Bocklisch, C., Skenderi, S., Drüke, M., de Mont, L.,  
1047 Toumazo, M., von Heimendahl, M., Brecht, M., Naud, R., Larkum, M.E., 2019.  
1048 Perirhinal input to neocortical layer 1 controls learning. *bioRxiv*, 713883.
- 1049 Douglas, R.J., Koch, C., Mahowald, M., Martin, K.A., Suarez, H.H., 1995. Recurrent excitation  
1050 in neocortical circuits. *Science* 269, 981-985.
- 1051 Douglas, R.J., Martin, K.A., 1991. A functional microcircuit for cat visual cortex. *J Physiol*  
1052 440, 735-769.
- 1053 Douglas, R.J., Martin, K.A., 2007a. Mapping the matrix: the ways of neocortex. *Neuron* 56,  
1054 226-238.
- 1055 Douglas, R.J., Martin, K.A., 2007b. Recurrent neuronal circuits in the neocortex. *Curr Biol* 17,  
1056 R496-500.
- 1057 Douglas, R.J., Martin, K.A.C., Whitteridge, D., 1989. A canonical microcircuit for neocortex.  
1058 *Neural Comput* 1, 480-488.
- 1059 El-Shamayleh, Y., Ni, A.M., Horwitz, G.D., 2016. Strategies for targeting primate neural  
1060 circuits with viral vectors. *J Neurophysiol* 116, 122-134.
- 1061 Emmerling, T.C., Zimmermann, J., Sorger, B., Frost, M.A., Goebel, R., 2016. Decoding the  
1062 direction of imagined visual motion using 7T ultra-high field fMRI. *Neuroimage* 125, 61-  
1063 73.
- 1064 Ercsey-Ravasz, M., Markov, N.T., Lamy, C., Van Essen, D.C., Knoblauch, K., Toroczkai, Z.,  
1065 Kennedy, H., 2013. A predictive network model of cerebral cortical connectivity based  
1066 on a distance rule. *Neuron* 80, 184-197.
- 1067 Felleman, D.J., Van Essen, D.C., 1991. Distributed hierarchical processing in the primate  
1068 cerebral cortex. *Cereb Cortex* 1, 1-47.
- 1069 Ferster, D., Chung, S., Wheat, H., 1996. Orientation selectivity of thalamic input to simple cells  
1070 of cat visual cortex. *Nature* 380, 249-252.
- 1071 Friston, K., 2010. The free-energy principle: a unified brain theory? *Nat Rev Neurosci* 11, 127-  
1072 138.
- 1073 Friston, K., 2018. Does predictive coding have a future? *Nat Neurosci* 21, 1019-1021.
- 1074 Geschwind, D.H., Rakic, P., 2013. Cortical evolution: judge the brain by its cover. *Neuron* 80,  
1075 633-647.
- 1076 Gilbert, C.D., Li, W., 2013. Top-down influences on visual processing. *Nat Rev Neurosci* 14,  
1077 350-363.
- 1078 Goulas, A., Uylings, H.B., Stiers, P., 2014. Mapping the hierarchical layout of the structural  
1079 network of the macaque prefrontal cortex. *Cereb Cortex* 24, 1178-1194.

- 1080 Gray, C.M., Konig, P., Engel, A.K., Singer, W., 1989. Oscillatory responses in cat visual cortex  
1081 exhibit inter-columnar synchronization which reflects global stimulus properties. *Nature*  
1082 338, 334-337.
- 1083 Gregoriou, G.G., Gotts, S.J., Desimone, R., 2012. Cell-type-specific synchronization of neural  
1084 activity in FEF with V4 during attention. *Neuron* 73, 581-594.
- 1085 Gregoriou, G.G., Gotts, S.J., Zhou, H., Desimone, R., 2009. High-frequency, long-range  
1086 coupling between prefrontal and visual cortex during attention. *Science* 324, 1207-1210.
- 1087 Gregory, R.L., 1997. Knowledge in perception and illusion. *Philos Trans R Soc Lond B Biol*  
1088 *Sci* 352, 1121-1127.
- 1089 Grezes, J., Decety, J., 2001. Functional anatomy of execution, mental simulation, observation,  
1090 and verb generation of actions: a meta-analysis. *Hum Brain Mapp* 12, 1-19.
- 1091 Haeusler, S., Maass, W., 2007. A statistical analysis of information-processing properties of  
1092 lamina-specific cortical microcircuit models. *Cereb Cortex* 17, 149-162.
- 1093 Haider, B., Hausser, M., Carandini, M., 2013. Inhibition dominates sensory responses in the  
1094 awake cortex. *Nature* 493, 97-100.
- 1095 Harris, K.D., Mrsic-Flogel, T.D., 2013. Cortical connectivity and sensory coding. *Nature* 503,  
1096 51-58.
- 1097 Harris, K.D., Shepherd, G.M., 2015. The neocortical circuit: themes and variations. *Nat*  
1098 *Neurosci* 18, 170-181.
- 1099 Hasenstaub, A., Shu, Y., Haider, B., Kraushaar, U., Duque, A., McCormick, D.A., 2005.  
1100 Inhibitory postsynaptic potentials carry synchronized frequency information in active  
1101 cortical networks. *Neuron* 47, 423-435.
- 1102 Hawkins, J., Blakeslee, S., 2004. *On intelligence: How A New Understanding of the brain will*  
1103 *lad to the creation of truely intelligent machines.* Owl books.
- 1104 Heide, M., Haffner, C., Murayama, A., Kurotaki, Y., Shinohara, H., Okano, H., Sasaki, E.,  
1105 Huttner, W.B., 2020. Human-specific ARHGAP11B increases size and folding of primate  
1106 neocortex in the fetal marmoset. *Science*, eabb2401.
- 1107 Hilgetag, C.C., Goulas, A., 2020. 'Hierarchy' in the organization of brain networks. *Philos Trans*  
1108 *R Soc Lond B Biol Sci* 375, 20190319.
- 1109 Hilgetag, C.C., O'Neill, M.A., Young, M.P., 1996. Indeterminate organization of the visual  
1110 system. *Science* 271, 776-777.
- 1111 Hinton, G.E., 2007. Learning multiple layers of representation. *Trends Cogn Sci* 11, 428-434.
- 1112 Hodge, R.D., Bakken, T.E., Miller, J.A., Smith, K.A., Barkan, E.R., Graybiuck, L.T., Close,  
1113 J.L., Long, B., Johansen, N., Penn, O., Yao, Z., Eggermont, J., Holtt, T., Levi, B.P.,

- 1114 Shehata, S.I., Aebermann, B., Beller, A., Bertagnolli, D., Brouner, K., Casper, T., Cobbs,  
1115 C., Dalley, R., Dee, N., Ding, S.L., Ellenbogen, R.G., Fong, O., Garren, E., Goldy, J.,  
1116 Gwinn, R.P., Hirschstein, D., Keene, C.D., Keshk, M., Ko, A.L., Lathia, K., Mahfouz,  
1117 A., Maltzer, Z., McGraw, M., Nguyen, T.N., Nyhus, J., Ojemann, J.G., Oldre, A., Parry,  
1118 S., Reynolds, S., Rimorin, C., Shapovalova, N.V., Somasundaram, S., Szafer, A.,  
1119 Thomsen, E.R., Tieu, M., Quon, G., Scheuermann, R.H., Yuste, R., Sunkin, S.M.,  
1120 Lelieveldt, B., Feng, D., Ng, L., Bernard, A., Hawrylycz, M., Phillips, J.W., Tasic, B.,  
1121 Zeng, H., Jones, A.R., Koch, C., Lein, E.S., 2019. Conserved cell types with divergent  
1122 features in human versus mouse cortex. *Nature* 573, 61-68.
- 1123 Hu, H., Gan, J., Jonas, P., 2014. Interneurons. Fast-spiking, parvalbumin(+) GABAergic  
1124 interneurons: from cellular design to microcircuit function. *Science* 345, 1255263.
- 1125 Hubel, D., 1995. *Eye, brain and vision*. Freeman and Co, New York.
- 1126 Hubel, D.H., Wiesel, T.N., 1962. Receptive fields binocular interaction and functional  
1127 architecture in the cat visual cortex. *J Physiol* 160, 106-154.
- 1128 Hubel, D.H., Wiesel, T.N., 1977. Ferrier lecture. Functional architecture of macaque monkey  
1129 visual cortex. *Proc R Soc Lond B Biol Sci* 198, 1-59.
- 1130 Huber, L., Finn, E.S., Chai, Y., Goebel, R., Stirnberg, R., Stocker, T., Marrett, S., Uludag, K.,  
1131 Kim, S.G., Han, S., Bandettini, P.A., Poser, B.A., 2020. Layer-dependent functional  
1132 connectivity methods. *Prog Neurobiol*, 101835.
- 1133 Jaynes, J., 1976. *The origin of consciousness in the breakdown of the bicameral mind*.  
1134 Houghton Mifflin Company, Boston.
- 1135 Jouhanneau, J.S., Kremkow, J., Poulet, J.F.A., 2018. Single synaptic inputs drive high-precision  
1136 action potentials in parvalbumin expressing GABA-ergic cortical neurons in vivo. *Nat*  
1137 *Commun* 9, 1540.
- 1138 Kaas, J.H., Lin, C.S., 1977. Cortical projections of area 18 in owl monkeys. *Vision Res* 17,  
1139 739-741.
- 1140 Kay, K., Chung, J.E., Sosa, M., Schor, J.S., Karlsson, M.P., Larkin, M.C., Liu, D.F., Frank,  
1141 L.M., 2020. Constant Sub-second Cycling between Representations of Possible Futures  
1142 in the Hippocampus. *Cell* 180, 552-567 e525.
- 1143 Keller, G.B., Mrcic-Flogel, T.D., 2018. Predictive Processing: A Canonical Cortical  
1144 Computation. *Neuron* 100, 424-435.
- 1145 Kemper, V.G., De Martino, F., Emmerling, T.C., Yacoub, E., Goebel, R., 2018. High resolution  
1146 data analysis strategies for mesoscale human functional MRI at 7 and 9.4T. *Neuroimage*  
1147 164, 48-58.

- 1148 Kennedy, H., Bullier, J., 1985. A double-labeling investigation of the afferent connectivity to  
1149 cortical areas V1 and V2 of the macaque monkey. *J Neurosci* 5, 2815-2830.
- 1150 Kennedy, H., Bullier, J., Dehay, C., 1989. Transient projections from the superior temporal  
1151 sulcus to area 17 in the newborn macaque monkey. *Proc Natl Acad Sci USA* 86, 8093-  
1152 8097.
- 1153 Klink, P.C., Dagnino, B., Gariel-Mathis, M.A., Roelfsema, P.R., 2017. Distinct Feedforward  
1154 and Feedback Effects of Microstimulation in Visual Cortex Reveal Neural Mechanisms  
1155 of Texture Segregation. *Neuron* 95, 209-220 e203.
- 1156 Ko, H., Hofer, S.B., Pichler, B., Buchanan, K.A., Sjostrom, P.J., Mrsic-Flogel, T.D., 2011.  
1157 Functional specificity of local synaptic connections in neocortical networks. *Nature* 473,  
1158 87-91.
- 1159 Koehlin, E., Ody, C., Kouneiher, F., 2003. The architecture of cognitive control in the human  
1160 prefrontal cortex. *Science* 302, 1181-1185.
- 1161 Kok, P., Bains, L.J., van Mourik, T., Norris, D.G., de Lange, F.P., 2016. Selective Activation  
1162 of the Deep Layers of the Human Primary Visual Cortex by Top-Down Feedback. *Curr*  
1163 *Biol* 26, 371-376.
- 1164 Kosslyn, S.M., 1994. *Image and Brain*. MIT Press.
- 1165 Kuypers, H.G.J.M., Szwarcbart, M.K., Mishkin, M., Rosvold, H.E., 1965. Occipitotemporal  
1166 corticocortical connections in the rhesus monkey. *Exp Neurol* 11, 245-262.
- 1167 Latawiec, D., Martin, K.A., Meskenaite, V., 2000. Termination of the geniculocortical  
1168 projection in the striate cortex of macaque monkey: a quantitative immunoelectron  
1169 microscopic study. *J Comp Neurol* 419, 306-319.
- 1170 LeCun, Y., Bengio, Y., Hinton, G., 2015. Deep learning. *Nature* 521, 436-444.
- 1171 Lee, T.S., Mumford, D., 2003. Hierarchical Bayesian inference in the visual cortex. *J Opt Soc*  
1172 *Am A Opt Image Sci Vis* 20, 1434-1448.
- 1173 Lee, W.C., Bonin, V., Reed, M., Graham, B.J., Hood, G., Glattfelder, K., Reid, R.C., 2016.  
1174 Anatomy and function of an excitatory network in the visual cortex. *Nature* 532, 370-  
1175 374.
- 1176 Lesnoff, M., Lancelot, R., 2012. aod: Analysis of Overdispersed Data. R package version 1.3  
1177 <http://cran.r-project.org/package=aod>.
- 1178 Lien, A.D., Scanziani, M., 2013. Tuned thalamic excitation is amplified by visual cortical  
1179 circuits. *Nat Neurosci* 16, 1315-1323.

- 1180 Lukaszewicz, A., Savatier, P., Cortay, V., Giroud, P., Huissoud, C., Berland, M., Kennedy, H.,  
1181 Dehay, C., 2005. G1 phase regulation, area-specific cell cycle control, and  
1182 cytoarchitectonics in the primate cortex. *Neuron* 47, 353-364.
- 1183 Lund, J.S., Lund, R.D., Hendrickson, A.E., Bunt, A.H., Fuchs, A.F., 1975. The origin of  
1184 efferent pathways from the primary visual cortex of the macaque monkey as shown by  
1185 retrograde transport of horseradish peroxydase. *J Comp Neurol* 164, 287-304.
- 1186 Magrou, L., Barone, P., Markov, N.T., Killackey, H.P., Giroud, P., Berland, M., Knoblauch,  
1187 K., Dehay, C., Kennedy, H., 2018. How Areal Specification Shapes the Local and  
1188 Interareal Circuits in a Macaque Model of Congenital Blindness. *Cereb Cortex* 28, 3017-  
1189 3034.
- 1190 Margulies, D.S., Ghosh, S.S., Goulas, A., Falkiewicz, M., Huntenburg, J.M., Langs, G., Bezgin,  
1191 G., Eickhoff, S.B., Castellanos, F.X., Petrides, M., Jefferies, E., Smallwood, J., 2016.  
1192 Situating the default-mode network along a principal gradient of macroscale cortical  
1193 organization. *Proc Natl Acad Sci U S A* 113, 12574-12579.
- 1194 Markov, N.T., Ercsey-Ravasz, M., Van Essen, D.C., Knoblauch, K., Toroczkai, Z., Kennedy,  
1195 H., 2013. Cortical high-density counter-stream architectures. *Science* 342, 1238406.
- 1196 Markov, N.T., Ercsey-Ravasz, M.M., Ribeiro Gomes, A.R., Lamy, C., Magrou, L., Vezoli, J.,  
1197 Misery, P., Falchier, A., Quilodran, R., Gariel, M.A., Sallet, J., Gamanut, R., Huissoud,  
1198 C., Clavagnier, S., Giroud, P., Sappey-Marinier, D., Barone, P., Dehay, C., Toroczkai, Z.,  
1199 Knoblauch, K., Van Essen, D.C., Kennedy, H., 2014a. A weighted and directed interareal  
1200 connectivity matrix for macaque cerebral cortex. *Cereb Cortex* 24, 17-36.
- 1201 Markov, N.T., Kennedy, H., 2013. The importance of being hierarchical. *Curr Opin Neurobiol*  
1202 23, 187-194.
- 1203 Markov, N.T., Misery, P., Falchier, A., Lamy, C., Vezoli, J., Quilodran, R., Gariel, M.A.,  
1204 Giroud, P., Ercsey-Ravasz, M., Pilaz, L.J., Huissoud, C., Barone, P., Dehay, C.,  
1205 Toroczkai, Z., Van Essen, D.C., Kennedy, H., Knoblauch, K., 2011. Weight Consistency  
1206 Specifies Regularities of Macaque Cortical Networks. *Cereb Cortex* 21, 1254-1272.
- 1207 Markov, N.T., Vezoli, J., Chameau, P., Falchier, A., Quilodran, R., Huissoud, C., Lamy, C.,  
1208 Misery, P., Giroud, P., Barone, P., Dehay, C., Ullman, S., Knoblauch, K., Kennedy, H.,  
1209 2014b. The Anatomy of Hierarchy: Feedforward and feedback pathways in macaque  
1210 visual cortex. *J Comp Neurol* 522, 225-259.
- 1211 Marshel, J.H., Kim, Y.S., Machado, T.A., Quirin, S., Benson, B., Kadmon, J., Raja, C.,  
1212 Chibukhchyan, A., Ramakrishnan, C., Inoue, M., Shane, J.C., McKnight, D.J.,

- 1213 Yoshizawa, S., Kato, H.E., Ganguli, S., Deisseroth, K., 2019. Cortical layer-specific  
1214 critical dynamics triggering perception. *Science* 365.
- 1215 Martin, K.A.C., 1994. A Brief-History of the Feature Detector. *Cereb Cortex* 4, 1-7.
- 1216 Martinez-Millan, L., Hollander, H., 1975. Cortico-cortical projections from striate cortex of the  
1217 squirrel monkey (*saimiri sciureus*). A radioautographic study. *Brain Res* 83, 405-417.
- 1218 McAdams, C.J., Maunsell, J.H., 1999. Effects of attention on orientation-tuning functions of  
1219 single neurons in macaque cortical area V4. *J Neurosci* 19, 431-441.
- 1220 Mejias, J.F., Murray, J.D., Kennedy, H., Wang, X.J., 2016. Feedforward and feedback  
1221 frequency-dependent interactions in a large-scale laminar network of the primate cortex.  
1222 *Sci Adv* 2, e1601335.
- 1223 Michalareas, G., Vezoli, J., van Pelt, S., Schoffelen, J.M., Kennedy, H., Fries, P., 2016. Alpha-  
1224 Beta and Gamma Rhythms Subserve Feedback and Feedforward Influences among  
1225 Human Visual Cortical Areas. *Neuron* 89, 384-397.
- 1226 Moore, C.I., Carlen, M., Knoblich, U., Cardin, J.A., 2010. Neocortical interneurons: from  
1227 diversity, strength. *Cell* 142, 189-193.
- 1228 Moore, T., Armstrong, K.M., 2003. Selective gating of visual signals by microstimulation of  
1229 frontal cortex. *Nature* 421, 370-373.
- 1230 Mountcastle, V., 1995. The evolution of ideas concerning the function of the neocortex. *Cerebral*  
1231 *cortex* 5, 289-295.
- 1232 Mountcastle, V.B., 1957. Modality and topographic properties of single neurons of cat's  
1233 somatic sensory cortex. *J Neurophysiol* 20, 408-434.
- 1234 Mumford, D., 1992. On the computational architecture of the neocortex. II. The role of cortico-  
1235 cortical loops. *Biol Cybern* 66, 241-251.
- 1236 Naselaris, T., Olman, C.A., Stansbury, D.E., Ugurbil, K., Gallant, J.L., 2015. A voxel-wise  
1237 encoding model for early visual areas decodes mental images of remembered scenes.  
1238 *Neuroimage* 105, 215-228.
- 1239 Nassi, J.J., Cepko, C.L., Born, R.T., Beier, K.T., 2015. Neuroanatomy goes viral! *Front*  
1240 *Neuroanat* 9, 80.
- 1241 Nørretranders, T., 1991. *The user illusion: Cutting consciousness down to size*. Viking, New  
1242 York, NY, US.
- 1243 Paquola, C., Vos De Wael, R., Wagstyl, K., Bethlehem, R.A.I., Hong, S.J., Seidlitz, J.,  
1244 Bullmore, E.T., Evans, A.C., Misic, B., Margulies, D.S., Smallwood, J., Bernhardt, B.C.,  
1245 2019. Microstructural and functional gradients are increasingly dissociated in transmodal  
1246 cortices. *PLoS Biol* 17, e3000284.

- 1247 Petersen, C.C., Crochet, S., 2013. Synaptic computation and sensory processing in neocortical  
1248 layer 2/3. *Neuron* 78, 28-48.
- 1249 Pike, F.G., Goddard, R.S., Suckling, J.M., Ganter, P., Kasthuri, N., Paulsen, O., 2000. Distinct  
1250 frequency preferences of different types of rat hippocampal neurones in response to  
1251 oscillatory input currents. *J Physiol* 529 Pt 1, 205-213.
- 1252 Pouget, P., Stepniewska, I., Crowder, E.A., Leslie, M.W., Emeric, E.E., Nelson, M.J., Schall,  
1253 J.D., 2009. Visual and motor connectivity and the distribution of calcium-binding  
1254 proteins in macaque frontal eye field: implications for saccade target selection. *Front*  
1255 *Neuroanat* 3, 2.
- 1256 Rao, R.P., Ballard, D.H., 1999. Predictive coding in the visual cortex: a functional interpretation  
1257 of some extra-classical receptive-field effects. *Nat Neurosci* 2, 79-87.
- 1258 Richards, B.A., Lillicrap, T.P., Beaudoin, P., Bengio, Y., Bogacz, R., Christensen, A., Clopath,  
1259 C., Costa, R.P., de Berker, A., Ganguli, S., Gillon, C.J., Hafner, D., Kepecs, A.,  
1260 Kriegeskorte, N., Latham, P., Lindsay, G.W., Miller, K.D., Naud, R., Pack, C.C., Poirazi,  
1261 P., Roelfsema, P., Sacramento, J., Saxe, A., Scellier, B., Schapiro, A.C., Senn, W.,  
1262 Wayne, G., Yamins, D., Zenke, F., Zylberberg, J., Therien, D., Kording, K.P., 2019. A  
1263 deep learning framework for neuroscience. *Nat Neurosci* 22, 1761-1770.
- 1264 Richter, C.G., Coppola, R., Bressler, S.L., 2018. Top-down beta oscillatory signaling conveys  
1265 behavioral context in early visual cortex. *Sci Rep* 8, 6991.
- 1266 Rockland, K.S., Pandya, D.N., 1979. Laminar origins and terminations of cortical connections  
1267 of the occipital lobe in the rhesus monkey. *Brain Res* 179, 3-20.
- 1268 Roelfsema, P.R., de Lange, F.P., 2016. Early Visual Cortex as a Multiscale Cognitive  
1269 Blackboard. *Annu Rev Vis Sci* 2, 131-151.
- 1270 Sakata, S., Harris, K.D., 2009. Laminar structure of spontaneous and sensory-evoked  
1271 population activity in auditory cortex. *Neuron* 64, 404-418.
- 1272 Sanides, F., 1972. Representation in the cerebral cortex and its areal lamination patterns. In:  
1273 Bourne, G.H. (Ed.), *The structure and function of the nervous tissue*. Academic Press,  
1274 New York and London, pp. 329-453.
- 1275 Schall, J.D., 2015. Visuomotor Functions in the Frontal Lobe. *Annu Rev Vis Sci* 1, 469-498.
- 1276 Scherberger, H., Jarvis, M.R., Andersen, R.A., 2005. Cortical local field potential encodes  
1277 movement intentions in the posterior parietal cortex. *Neuron* 46, 347-354.
- 1278 Schneider, M., Kemper, V.G., Emmerling, T.C., De Martino, F., Goebel, R., 2019. Columnar  
1279 clusters in the human motion complex reflect consciously perceived motion axis. *Proc*  
1280 *Natl Acad Sci U S A* 116, 5096-5101.



- 1281 Schumacher, F.K., Schumacher, L.V., Schelter, B.O., Kaller, C.P., 2019. Functionally  
1282 dissociating ventro-dorsal components within the rostro-caudal hierarchical organization  
1283 of the human prefrontal cortex. *Neuroimage* 185, 398-407.
- 1284 Senden, M., Emmerling, T.C., van Hoof, R., Frost, M.A., Goebel, R., 2019. Reconstructing  
1285 imagined letters from early visual cortex reveals tight topographic correspondence  
1286 between visual mental imagery and perception. *Brain Struct Funct* 224, 1167-1183.
- 1287 Senzai, Y., Fernandez-Ruiz, A., Buzsaki, G., 2019. Layer-Specific Physiological Features and  
1288 Interlaminar Interactions in the Primary Visual Cortex of the Mouse. *Neuron* 101, 500-  
1289 513 e505.
- 1290 Shipp, S., 2016. Neural Elements for Predictive Coding. *Front Psychol* 7, 1792.
- 1291 Siu, C., Balsor, J., Federer, F., Angelucci, A., 2020. A direct interareal feedback-to-feedforward  
1292 circuit in primate visual cortex. *bioRxiv*, 2020.2007.2007.192450.
- 1293 Slotnick, S.D., Thompson, W.L., Kosslyn, S.M., 2005. Visual mental imagery induces  
1294 retinotopically organized activation of early visual areas. *Cereb Cortex* 15, 1570-1583.
- 1295 Smart, I.H., Dehay, C., Giroud, P., Berland, M., Kennedy, H., 2002. Unique morphological  
1296 features of the proliferative zones and postmitotic compartments of the neural epithelium  
1297 giving rise to striate and extrastriate cortex in the monkey. *Cereb Cortex* 12, 37-53.
- 1298 Song, S., Sjöstrom, P.J., Reigl, M., Nelson, S., Chklovskii, D.B., 2005. Highly nonrandom  
1299 features of synaptic connectivity in local cortical circuits. *PLoS Biol* 3, e68.
- 1300 Sousa, A.M.M., Meyer, K.A., Santpere, G., Gulden, F.O., Sestan, N., 2017. Evolution of the  
1301 Human Nervous System Function, Structure, and Development. *Cell* 170, 226-247.
- 1302 Spatz, W.B., Tigges, J., Tigges, M., 1970. Subcortical projections, cortical associations, and  
1303 some intrinsic interlaminar connections of the striate cortex in the squirrel monkey  
1304 (*saimiri*). *J Comp Neurol* 140, 155-174.
- 1305 Spyropoulos, G., Dowdall, J.R., Schölvinck, M.L., Bosman, C.A., Lima, B., Peter, A., Onorato,  
1306 I., Klon-Lipok, J., Roese, R., Neuenschwander, S., Singer, W., Vinck, M., Fries, P., 2020.  
1307 Spontaneous variability in gamma dynamics described by a linear harmonic oscillator  
1308 driven by noise. *bioRxiv*, 793729.
- 1309 Tang, S., Zhang, Y., Li, Z., Li, M., Liu, F., Jiang, H., Lee, T.S., 2018. Large-scale two-photon  
1310 imaging revealed super-sparse population codes in the V1 superficial layer of awake  
1311 monkeys. *Elife* 7.
- 1312 Thirion, B., Duchesnay, E., Hubbard, E., Dubois, J., Poline, J.B., LeBihan, D., Dehaene, S.,  
1313 2006. Inverse retinotopy: inferring the visual content of images from brain activation  
1314 patterns. *Neuroimage* 33, 1104-1116.

- 1315 Tigges, J., Spatz, W.B., Tigges, M., 1973. Reciprocal point-to-point connections between  
1316 parastriate and striate cortex in the squirrel monkey (saimiri). *J Comp Neurol* 148, 481-  
1317 490.
- 1318 Treue, S., Maunsell, J.H., 1996. Attentional modulation of visual motion processing in cortical  
1319 areas MT and MST. *Nature* 382, 539-541.
- 1320 Tsodyks, M., Kenet, T., Grinvald, A., Arieli, A., 1999. Linking spontaneous activity of single  
1321 cortical neurons and the underlying functional architecture. *Science* 286, 1943-1946.
- 1322 Ullman, S., 1995. Sequence seeking and counter streams: a computational model for  
1323 bidirectional information flow in the visual cortex. *Cereb Cortex* 5, 1-11.
- 1324 Ullman, S., 2000. Sequence seeking and counter streams: A model for information flow in the  
1325 visual cortex. *High-Level Vision*. Bradford / MIT Press.
- 1326 Van Essen, D.C., Zeki, S., 1978. The topographic organization of rhesus monkey prestriate  
1327 cortex. *J Physiol* 277, 193-226.
- 1328 van Kerkoerle, T., Self, M.W., Dagnino, B., Gariel-Mathis, M.A., Poort, J., van der Togt, C.,  
1329 Roelfsema, P.R., 2014. Alpha and gamma oscillations characterize feedback and  
1330 feedforward processing in monkey visual cortex. *Proc Natl Acad Sci U S A* 111, 14332-  
1331 14341.
- 1332 van Kerkoerle, T., Self, M.W., Roelfsema, P.R., 2017. Layer-specificity in the effects of  
1333 attention and working memory on activity in primary visual cortex. *Nat Commun* 8,  
1334 13804.
- 1335 Vezoli, J., Falchier, A., Jouve, B., Knoblauch, K., Young, M., Kennedy, H., 2004. Quantitative  
1336 analysis of connectivity in the visual cortex: extracting function from structure.  
1337 *Neuroscientist* 10, 476-482.
- 1338 Vinck, M., Bosman, C.A., 2016. More Gamma More Predictions: Gamma-Synchronization as  
1339 a Key Mechanism for Efficient Integration of Classical Receptive Field Inputs with  
1340 Surround Predictions. *Front Syst Neurosci* 10, 35.
- 1341 Vinje, W.E., Gallant, J.L., 2000. Sparse coding and decorrelation in primary visual cortex  
1342 during natural vision. *Science* 287, 1273-1276.
- 1343 Walsh, K.S., McGovern, D.P., Clark, A., O'Connell, R.G., 2020. Evaluating the  
1344 neurophysiological evidence for predictive processing as a model of perception. *Ann N*  
1345 *Y Acad Sci* 1464, 242-268.
- 1346 Wang, X.-J., Kennedy, H., 2016. Brain structure and dynamics across scales: in search of rules.  
1347 *Curr Opin Neurobiol* 37, 92-98.

- 1348 Wang, X.J., 2010. Neurophysiological and computational principles of cortical rhythms in  
1349 cognition. *Physiol Rev* 90, 1195-1268.
- 1350 Whittington, J.C.R., Bogacz, R., 2019. Theories of Error Back-Propagation in the Brain. *Trends*  
1351 *Cogn Sci* 23, 235-250.
- 1352 Willmore, B.D., Mazer, J.A., Gallant, J.L., 2011. Sparse coding in striate and extrastriate visual  
1353 cortex. *J Neurophysiol* 105, 2907-2919.
- 1354 Won, H., Huang, J., Opland, C.K., Hartl, C.L., Geschwind, D.H., 2019. Human evolved  
1355 regulatory elements modulate genes involved in cortical expansion and  
1356 neurodevelopmental disease susceptibility. *Nat Commun* 10, 2396.
- 1357 Wong-Riley, M., 1978. Reciprocal connections between striate and prestriate cortex in the  
1358 squirrel monkey as demonstrated by combined peroxidase histochemistry and  
1359 autoradiography. *Brain Res* 147, 159-164.
- 1360 Yamins, D.L., DiCarlo, J.J., 2016. Using goal-driven deep learning models to understand  
1361 sensory cortex. *Nat Neurosci* 19, 356-365.
- 1362 York, G.K., 3rd, Steinberg, D.A., 2011. Hughlings Jackson's neurological ideas. *Brain* 134,  
1363 3106-3113.
- 1364 Zeng, H., Shen, E.H., Hohmann, J.G., Oh, S.W., Bernard, A., Royall, J.J., Glattfelder, K.J.,  
1365 Sunkin, S.M., Morris, J.A., Guillozet-Bongaarts, A.L., Smith, K.A., Ebbert, A.J.,  
1366 Swanson, B., Kuan, L., Page, D.T., Overly, C.C., Lein, E.S., Hawrylycz, M.J., Hof, P.R.,  
1367 Hyde, T.M., Kleinman, J.E., Jones, A.R., 2012. Large-scale cellular-resolution gene  
1368 profiling in human neocortex reveals species-specific molecular signatures. *Cell* 149,  
1369 483-496.
- 1370 Zipser, K., Lamme, V.A., Schiller, P.H., 1996. Contextual modulation in primary visual cortex.  
1371 *J Neurosci* 16, 7376-7389.
- 1372
- 1373
- 1374

1375 **Figure & Legends**

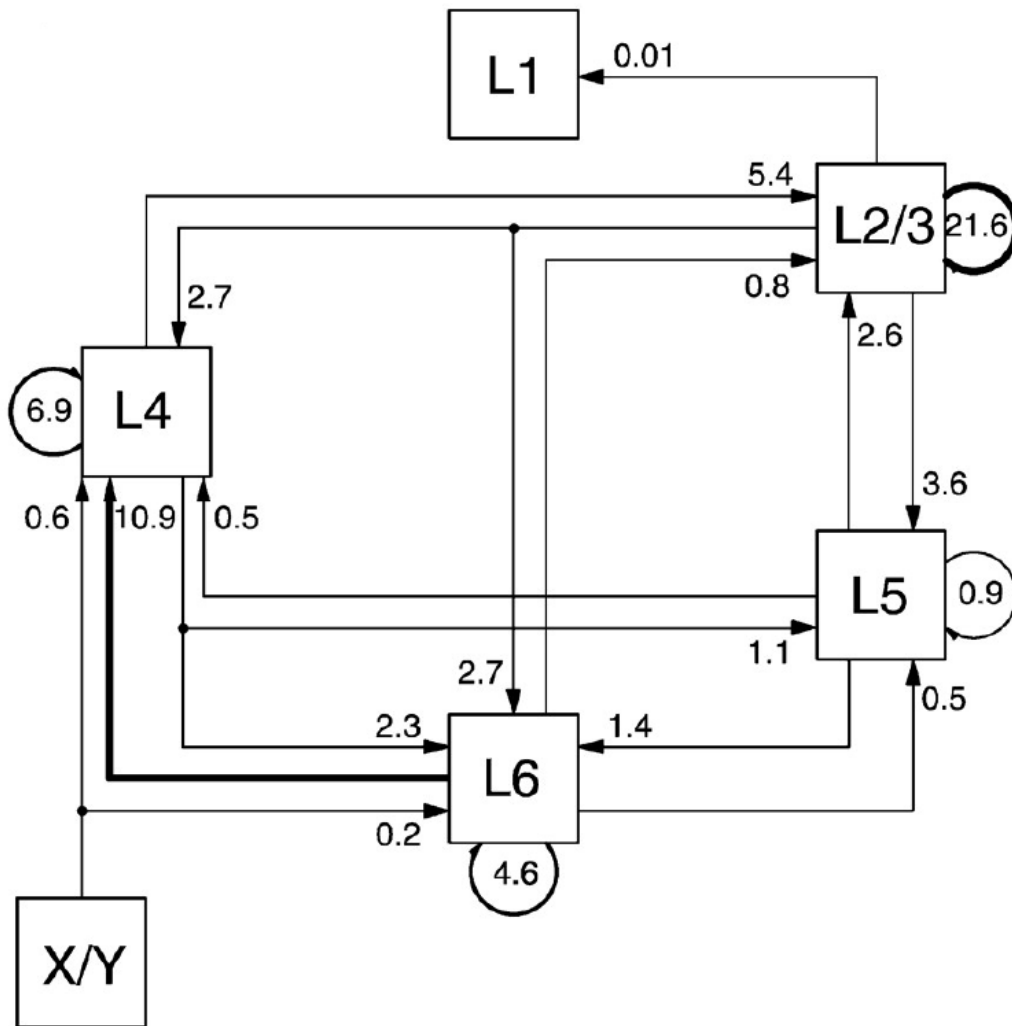

1376

1377 **Figure 1. Quantitative map of excitatory synapses between excitatory neurons of the local**  
1378 **microcircuit in visual cortex (area 17) of the cat.** Numbers indicate proportions of excitatory  
1379 synapses, note the dominance of within layer recurrent connectivity with 21.6 peak values in  
1380 Layers 2/3. The FF loop starts in layer 4, the major thalamic recipient layer and then extends to  
1381 layers 2/3, 5 and 6 with recurrent inputs back to layer 4. This FF loop corresponds to a little  
1382 less than half of synapses involved in self-innervation of individual cortical layers. X/Y refers  
1383 to the component cells of the lateral geniculate nucleus, the major thalamic relay. The original  
1384 canonical microcircuit is shown in Figure 9B. L refers to layer. From (Binzegger et al., 2004)  
1385 with permission.

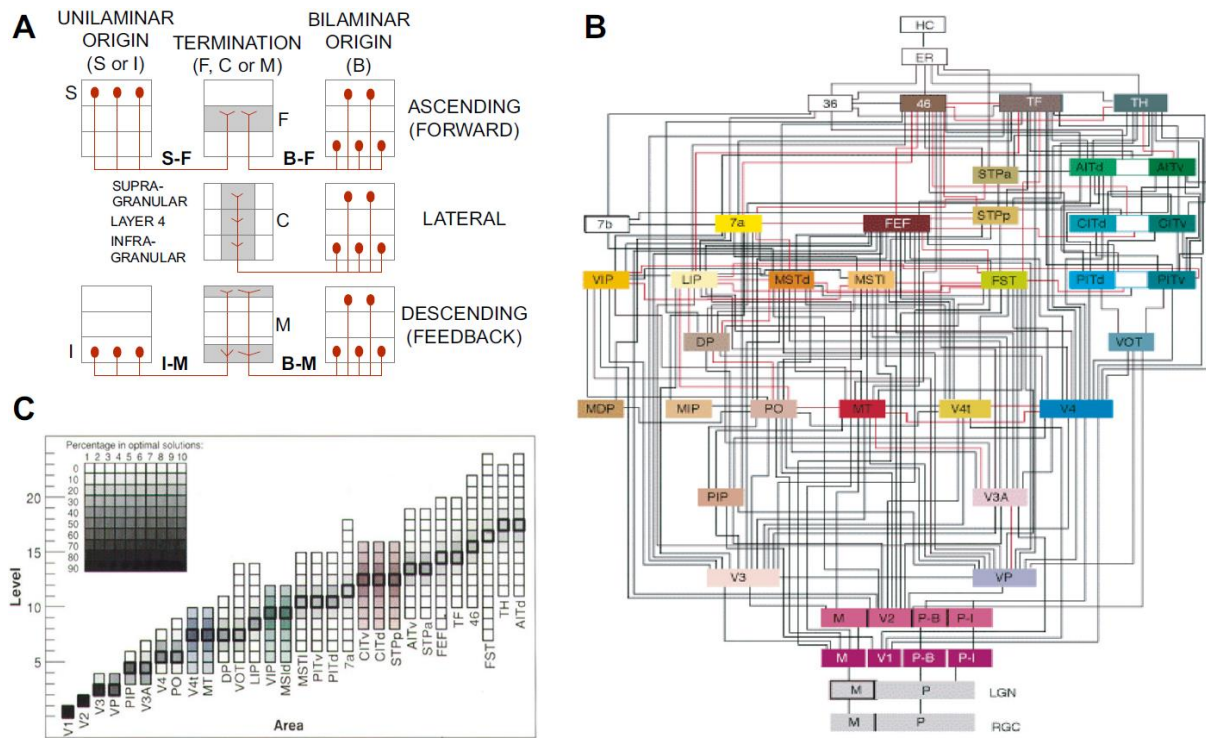

1386

1387 **Figure 2 The Felleman and Van Essen binary model of cortical hierarchy.** A) Criteria for  
 1388 classifying connections between areas as FF (top), lateral (middle) and FB (bottom) row.  
 1389 Termination patterns are depicted in the central column, preferentially in layer 4 (F pattern) FF,  
 1390 across all layers (C pattern) lateral, in upper and lower layers avoiding layer 4 (M pattern) FB.  
 1391 Laminar origin from a single layer (left column), is either supragranular (S) and therefore FF,  
 1392 or infragranular (I) and therefore FB. Bilaminar (B) origins (right column) either terminate in  
 1393 the middle layers (F pattern) and are therefore FF, terminate in all layers (lateral) or terminate  
 1394 predominantly in upper supra- and infragranular layers (M pattern) and therefore FB. **B)** The  
 1395 binary hierarchical model. **C):** Area frequency distributions for 150,000 optimal hierarchical  
 1396 orderings (Hilgetag et al., 1996).

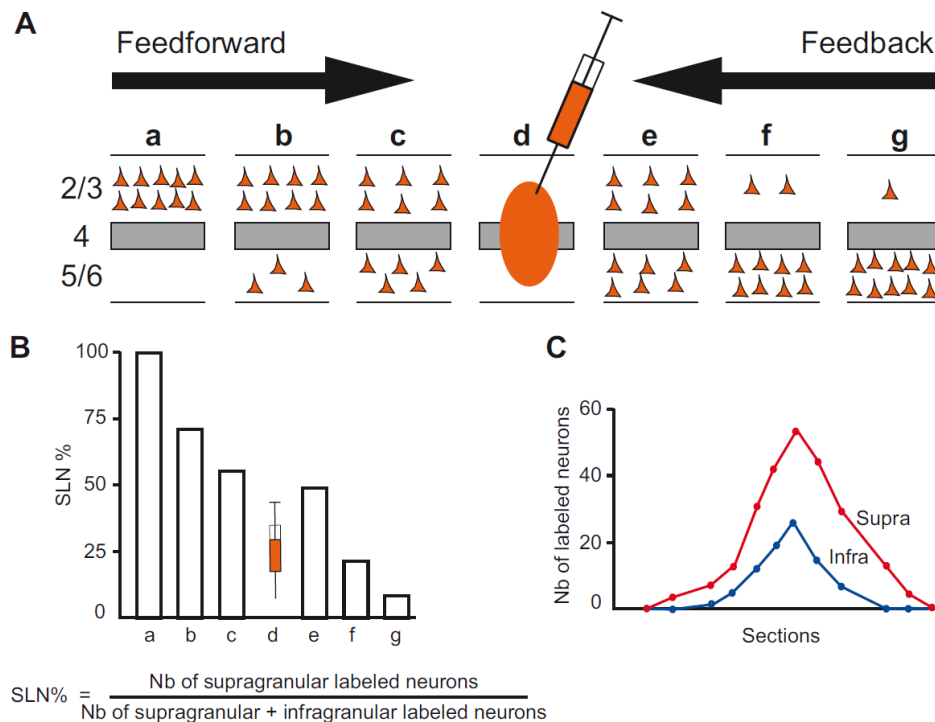

1397

1398 **Figure 3. Quantitative parameters characterizing the hierarchy.** A) The laminar  
 1399 distribution of parent neurons in each pathway, referred to as SLN (fraction of supragranular  
 1400 neurons) is determined by high frequency sampling and quantitative analysis of labeling. Supra-  
 1401 and infragranular layer neurons contribute to both FF and FB pathways, and their relative  
 1402 proportion is characteristic for each type of pathway. For a given injection there is a gradient  
 1403 of SLN of the labeled areas, between purely FF (SLN = 100%, all the parent neurons are in the  
 1404 supragranular layers) to purely FB (SLN = 0%, all the parent neurons in the infragranular  
 1405 layers) and a spectrum of intermediate proportions; B) All labeled areas can then be ordered by  
 1406 decreasing SLN values and this order is consistent with hierarchical order according to  
 1407 Felleman and Van Essen. SLN is thus used as an indicator of hierarchical distance between  
 1408 areas from the same injection; C) Reliable estimation of SLN crucially requires sampling  
 1409 labeling throughout the full extent of the projection zone in each area.

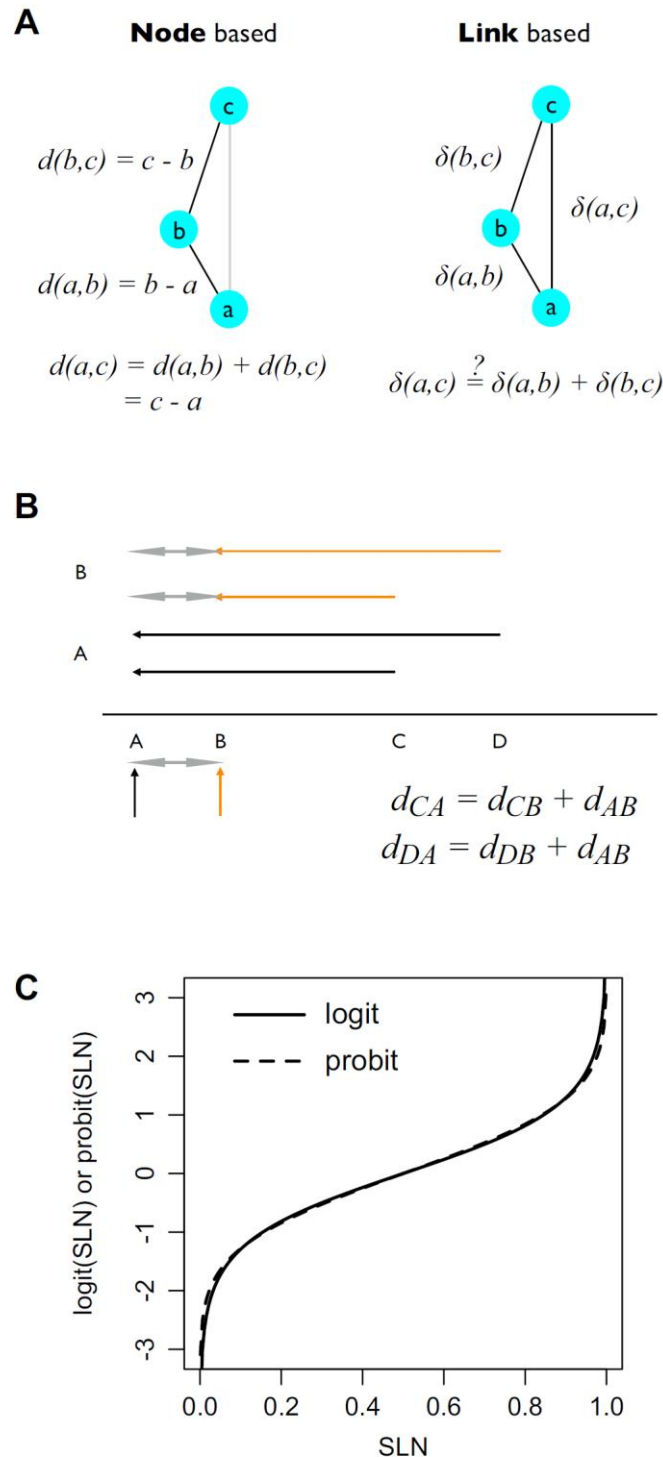

1410

1411 **Figure 4. Properties of nodes and links.** Nodes have fixed properties, a, b, c which in turn  
 1412 fixes their order and any distance measure, d, calculated from these properties. b. Link  
 1413 properties depend on the relations between node pairs, ab, bc, ac. The distance measures,  $\delta$ , for  
 1414 ab, and bc do not necessarily fix that for ac. The above graphs are unidirectional, but in bi-  
 1415 directional graphs the distances between nodes need not be symmetric. **B) Hierarchical scales.**  
 1416 Suppose a hierarchical scale between areas A, B, C, D, with the ordering and distances as  
 1417 illustrated on the bottom line. We expect measures of distance to be consistent measured

1418 between any pairs of areas. For example, injections in areas A and B lead to distances defined  
 1419 with respect to each of these areas, i.e., distances AB (double headed grey arrow), AC and AD  
 1420 (black arrows) for injection in area A, and BA (double headed grey arrow), BC and BD (orange  
 1421 arrows) for injection in area B. Consistency would imply, for example, that for a distance  
 1422 measure,  $d$ , the estimate of  $d_{AB} = d_{BA}$  would be the same for both injections, i.e.,  $d_{CA} - d_{CB} =$   
 1423  $d_{DA} - d_{DB}$ . **C) SLN Transformation.** Comparison of logit (solid) and probit (dashed)  
 1424 transformations of SLN values on the interval (0, 1). The logit SLN is defined as  $\ln(\text{SLN}/(1 -$   
 1425  $\text{SLN}))$ . The probit is defined as the inverse of the Gaussian cumulative distribution function  
 1426 and is often notated by  $\Phi^{-1}$ . The scale factor of the logit curve has been adjusted by a factor  
 1427 of 0.588 to match it to the probit curve.

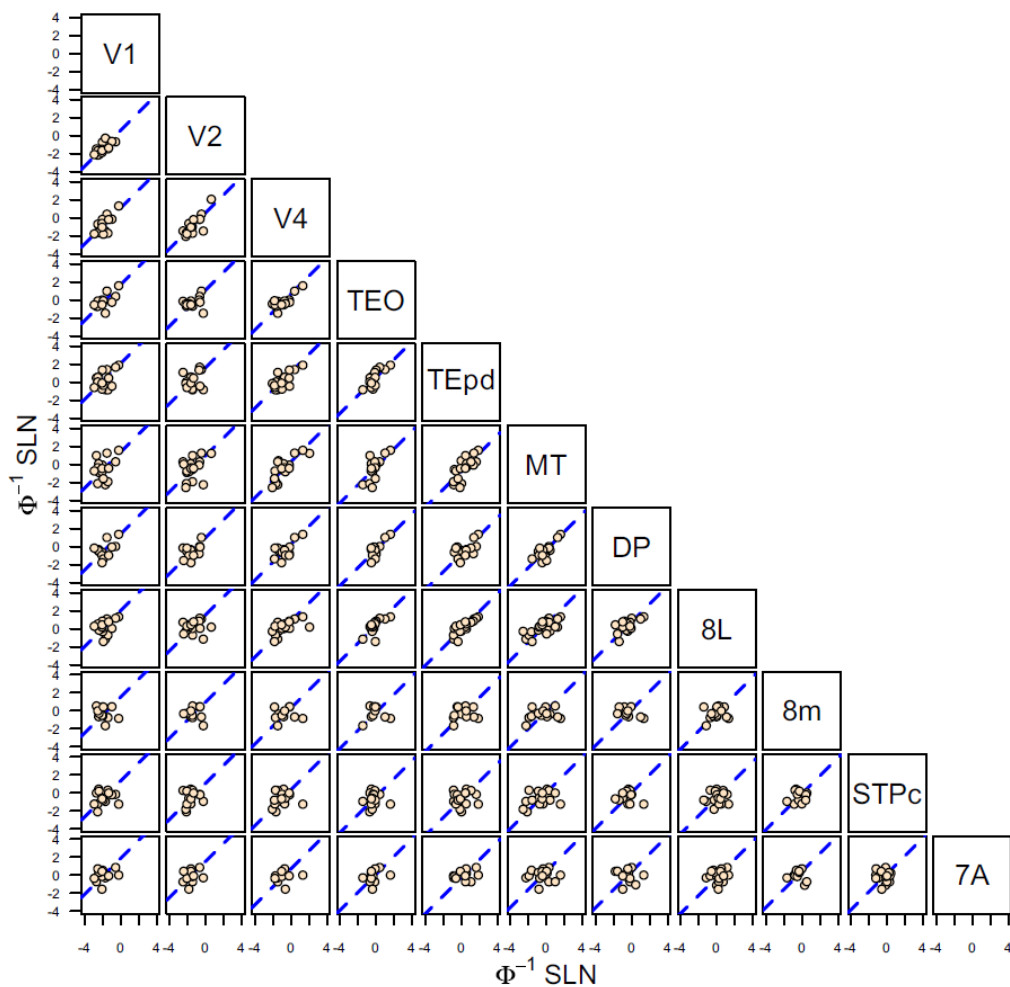

1428  
 1429 **Figure 5. Probit transformation.** Scatter plots of probit transformed SLN values of common  
 1430 source areas from pairs of 11 visual areas, obtained from retrograde tracer injections. The  
 1431 abscissa of each graph corresponds to the transformed SLN values of area  $i$ , indicated on the  
 1432 diagonal at the top of the column and the ordinate values are the transformed SLN values of



1433 area  $j$  indicated on the diagonal at the right of the row. The dashed blue line in each plot is the  
1434 best fit line of unit slope (replotted from (Markov et al., 2014b)).

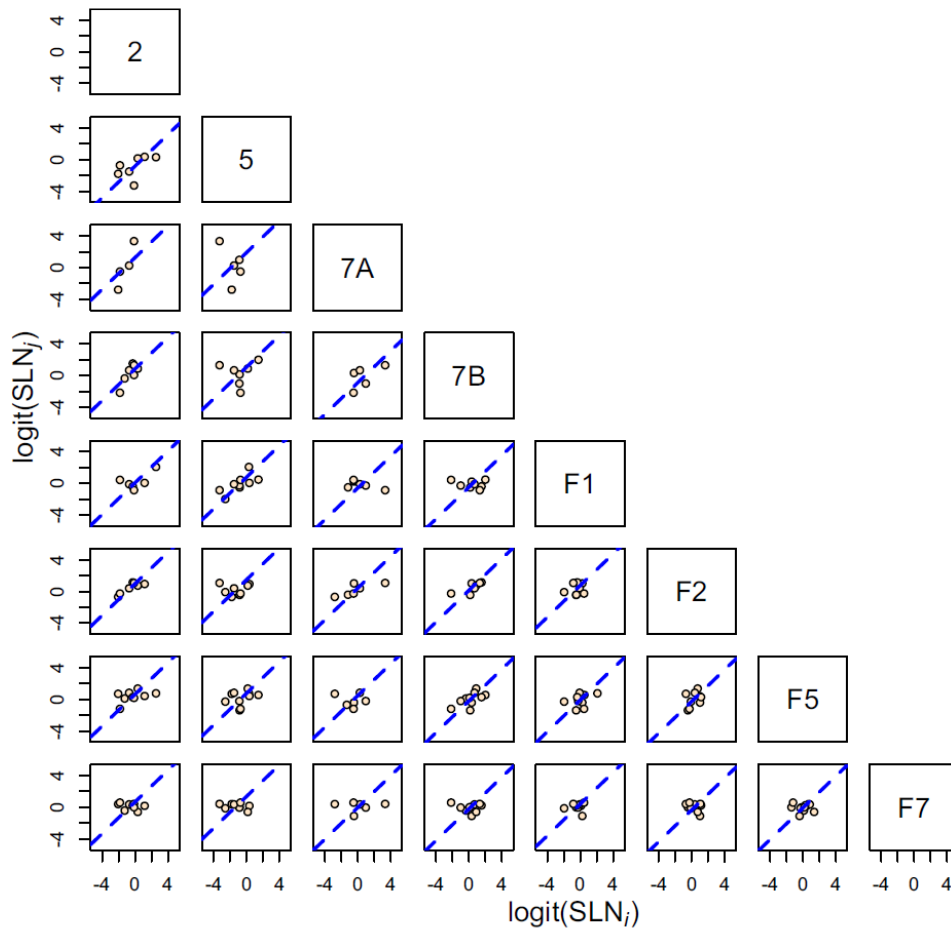

1435  
1436 **Figure 6. Logit transformation.** Scatter plots of logit transformed SLN values of common  
1437 source areas from pairs of 8 somatosensory and motor areas, obtained from retrograde tracer  
1438 injections. The plots follow the same format as in Figure 6 except that the SLN values from  
1439 each axis are transformed by the logit function. The dashed blue line in each plot is the best fit  
1440 line of unit slope.

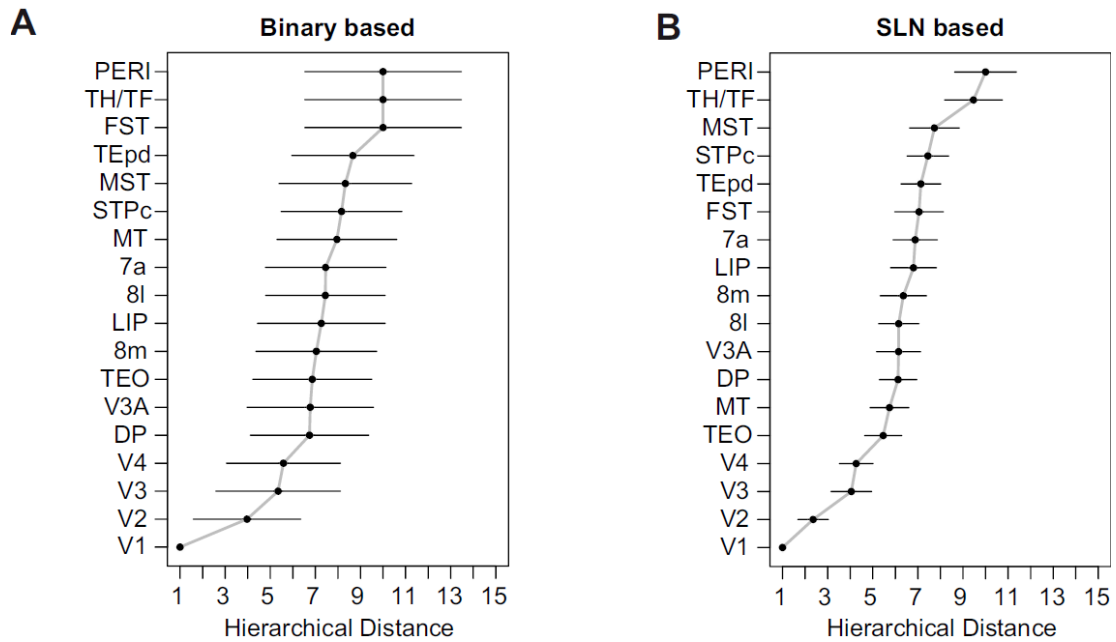

1441

1442 **Figure 7. Precision of estimated hierarchy based on hierarchical index.** **A.** Estimated  
1443 hierarchy obtained using logit transformed SLN values as a measure of hierarchical distance.  
1444 The counts of supra- and infragranular neurons are used as weights. The error bars are 95%  
1445 confidence intervals estimated from the covariance matrix of the fitted model. **B.** Estimated  
1446 hierarchy using a binary variable as an indicator of the hierarchical relation between area pairs.  
1447 A logit link was also used in this case. The larger 95% confidence intervals demonstrate the  
1448 loss of precision in estimating the hierarchical distance when using only binary information  
1449 about connectivity.

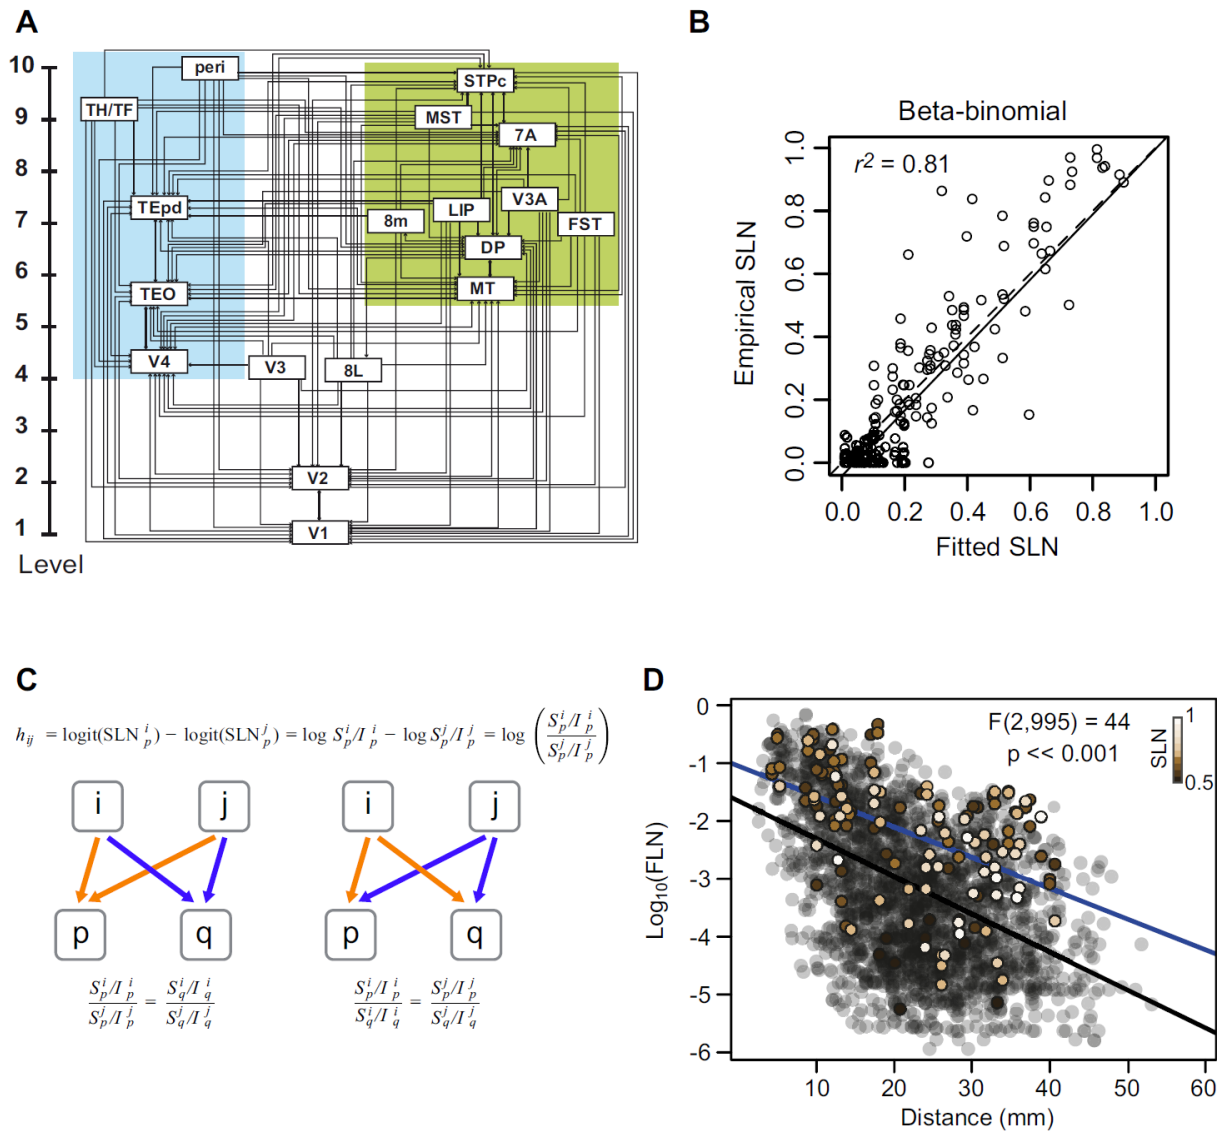

1450

1451 **Figure 8. Hierarchical organization of visual areas (A) estimated from the beta-binomial**

1452 **model.** The model only provides the vertical level of the areas with respect to the lowest level.

1453 For clarity of presentation, we have separated them laterally into ventral and dorsal stream

1454 areas. The estimated values are only unique up to adding a constant and multiplying by a

1455 coefficient. Here, we have the areas to span the range 1-10. **B)** The scatter plot shows the

1456 empirical SLN values plotted against those predicted by the model. The solid line is the unit

1457 slope line through the origin and the dashed line is the best fit linear regression. **C) Hierarchical**

1458 **distance.** The hierarchical distance,  $h_{ij}$ , between common projections from areas  $i$  and  $j$  to area

1459  $p$ , defined as the difference of logits of their SLN values, is equivalent to the log of the ratio of

1460 their supra- to infra-granular projection strengths to area  $p$ . This definition implies that the

1461 ratio between the laminar ratios of areas  $i$  and  $j$  to area  $p$  (orange arrows) is the same as that for

1462 any other target area  $q$  receiving projections from the same source areas (blue arrows), as

1463 formalized in the equation below the diagram. This is because the hierarchical distance from  $i$

1464 to  $j$  should be the same for injections in both areas  $p$  and  $q$ . b. A rearrangement of the equation  
 1465 (below) implies, also, that the ratio between the laminar ratios of projections from a common  
 1466 source area,  $i$ , to areas  $p$  and  $q$ , will be the same for any other common source area,  $j$ , to the  
 1467 same target areas. **D) Cortical-cortical strong loops.** The strength-distance relation of 1615  
 1468 projections from 91 to 29 cortical areas obtained from retrograde tracer injections. The  
 1469 transparent black points indicate all of the projections except those that participate in strong-  
 1470 loops in beige. The color gradient on these symbols corresponds to SLN strength as indicated  
 1471 by the inset color bar. The black line is the best fit linear regression to the transparent black  
 1472 points and the blue line is the best fit to the strong-loops. The F-statistic indicates the result of  
 1473 a nested likelihood test indicating the probability of a difference in strength between the two  
 1474 sets of points as large as that obtained under the null hypothesis that the true difference is zero,  
 1475 when physical distance via the WM is taken into account.

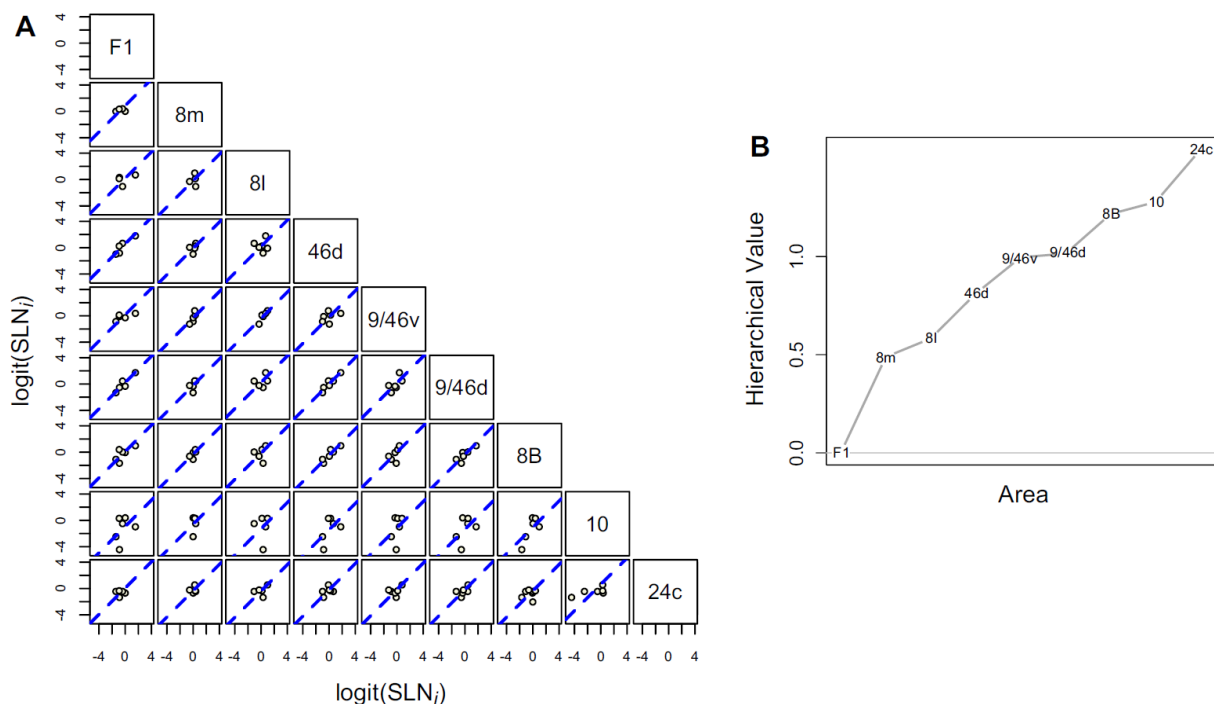

1476  
 1477 **Figure 9.** A) Scatter plots of logit transformed SLN values of common source areas from pairs  
 1478 of 9 frontal and pre-frontal areas, obtained from retrograde tracer injections. The plots follow  
 1479 the same format as previous in Figures 6 and 7. The dashed blue line in each plot is the best fit  
 1480 line of unit slope. B) Hierarchical scale values estimated for the 9 areas based on the proposed  
 1481 statistical model. Area F1 was assigned a value of 0 for model identifiability.

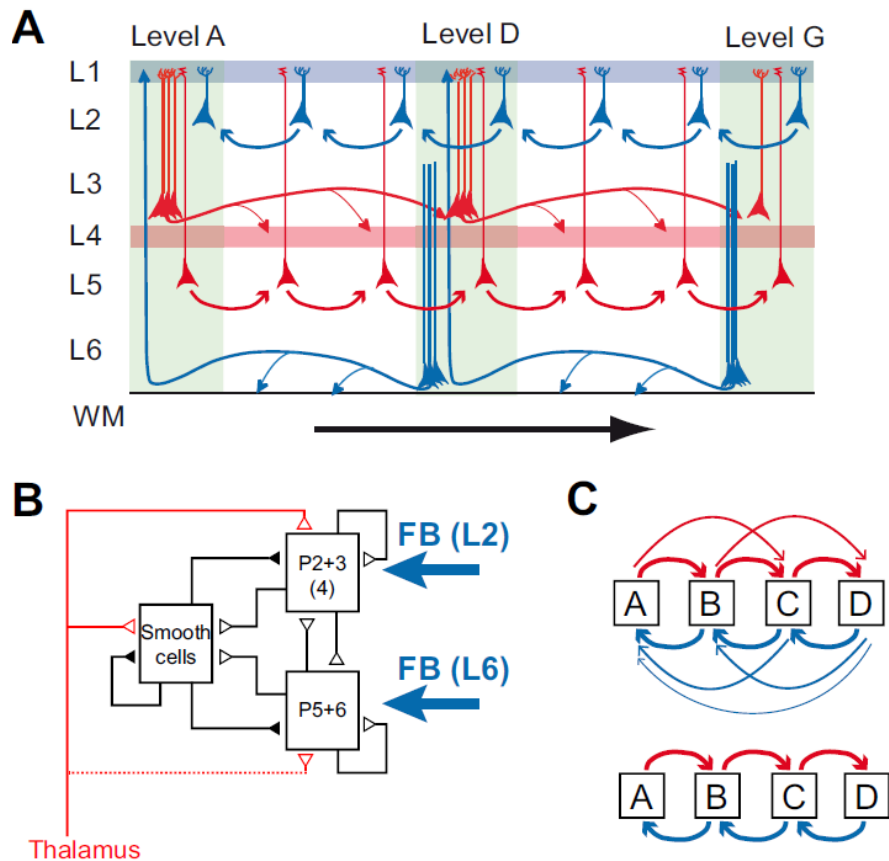

1482

1483 **Figure 10. Dual counterstream architecture of inter-areal pathways.** **A)** Parent neurons at  
1484 L3 and L5 have FF projections (red) to higher order areas reciprocated by FB projections (blue)  
1485 in L2 and the L6. Simultaneous tracer injections in high and low areas show that the upper layer  
1486 counterstream has near 100% segregation, i.e. the FF (FB) neurons do not send axon collaterals  
1487 to lower (higher) order areas. However the evidence that the FF and FB pathways form  
1488 continuous streams, as depicted here is indirect; what crucially remains to be elucidated are the  
1489 laminar details on the connectivity and the cellular targets. **B)** the canonical microcircuit  
1490 showing the two FB pathways targeting L2 and L6. Modified from (Douglas and Martin, 1991);  
1491 **C)** the incorrectly assumed serial processing (lower) between areas that is not observed in the  
1492 cortex, where instead each areas project to all upper and lower stream areas (all to all). (panel  
1493 A from (Markov et al., 2014b));

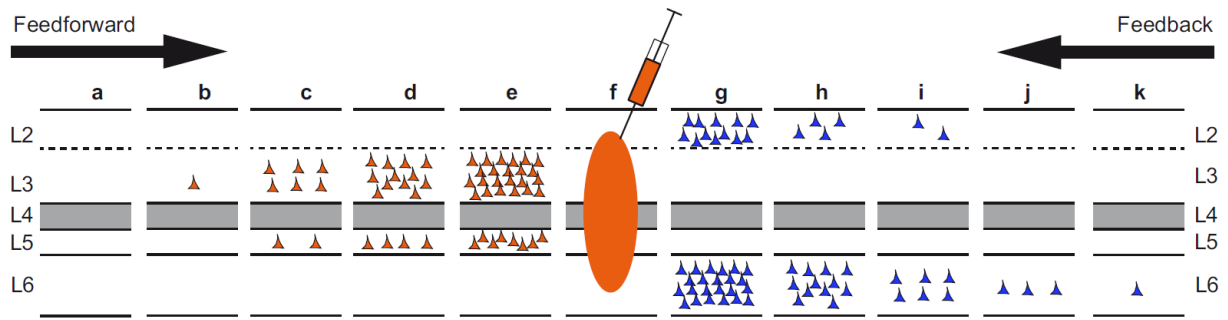

1494

1495 **Figure 11. Distance effects of labeling in individual layers.** This figure shows how FB projecting  
1496 neurons are differentially distributed in L2 and L6 and FF in L3 and L5. The characteristic SLN  
1497 gradient found in up- and down stream areas shown in figure 2 is due to different distance rules  
1498 operating in individual layers. Hence the short-distance spread of labeled neurons in L2 coupled  
1499 with the long-distance spread in L6 leads to the observed decrease in SLN with increasing FB  
1500 hierarchical distances. Likewise the long-distance spread of labeled neurons in L3 coupled with  
1501 the short-distance spread in L5 leads to the observed increase in SLN with increasing FF  
1502 hierarchical distances.

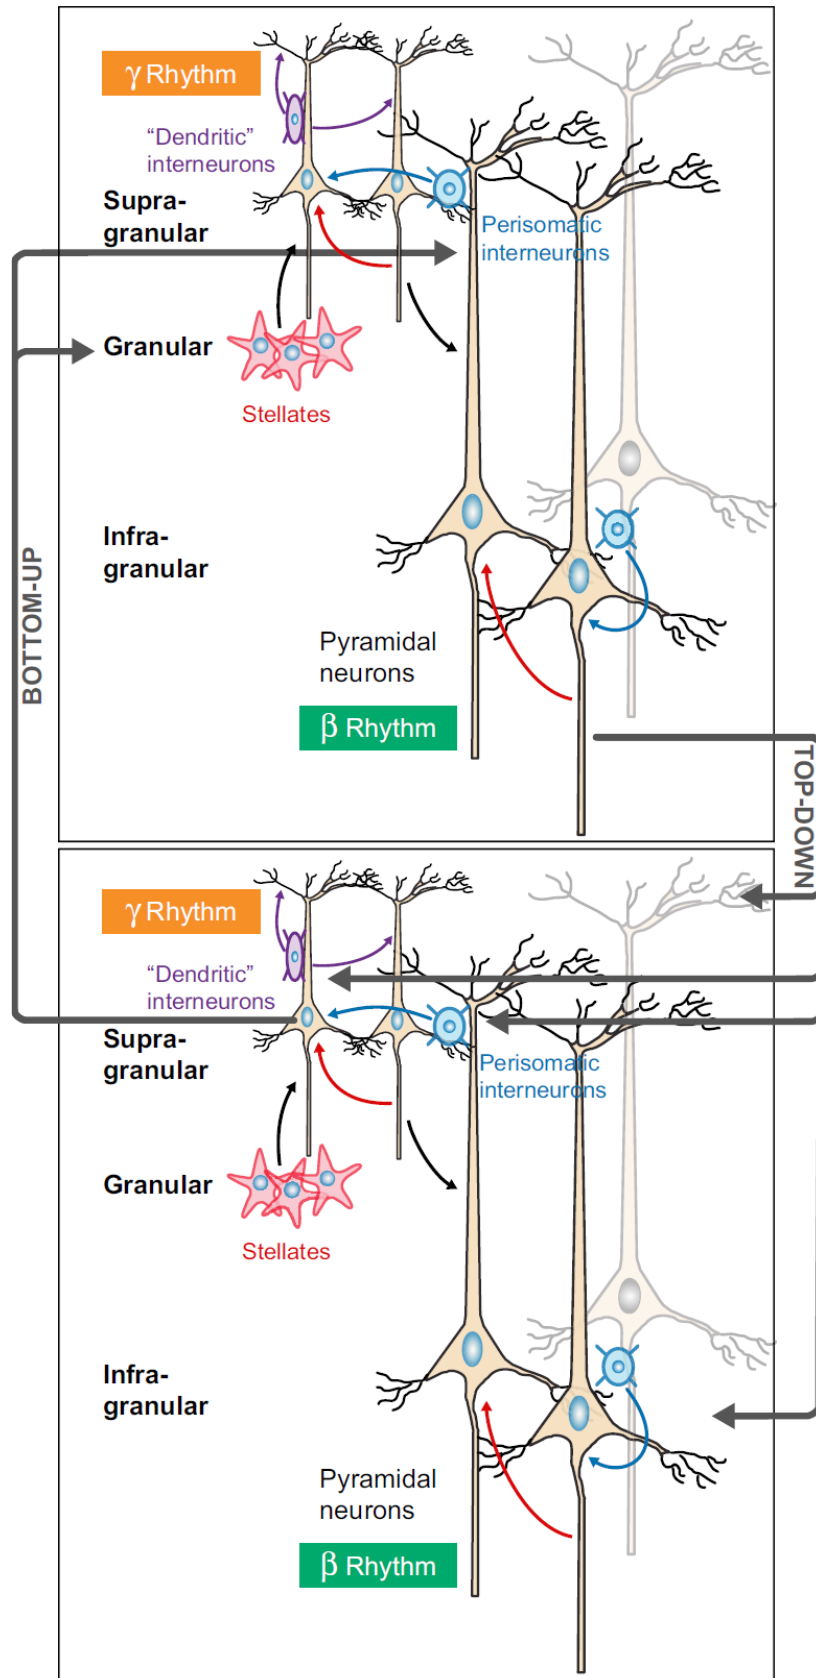

1503

1504 **Figure 12. Schematic circuit for the interplay between bottom-up and top-down signaling**

1505 **characterized by differential frequency-band synchrony. In a reciprocally connected loop**

1506 between a sensory-type area and a cognitive-type area, neural circuits in the superficial layers  
1507 are endowed with strong intrinsic synaptic connections and generate stochastic oscillations in  
1508 the gamma frequency range, whereas the deep layers have a propensity to display slower  
1509 oscillations in the lower beta or alpha frequency range. Top-down projections originate in the  
1510 deep layers and innervate pyramidal cells (brown), as well as dendrite-targeting (purple) and  
1511 perisoma-targeting (blue) inhibitory interneurons. In this scenario, low beta/alpha oscillations  
1512 are directly involved in top-down signaling, which interacts with locally generated gamma  
1513 oscillations. Adopted with permission from Wang (Wang, 2010).

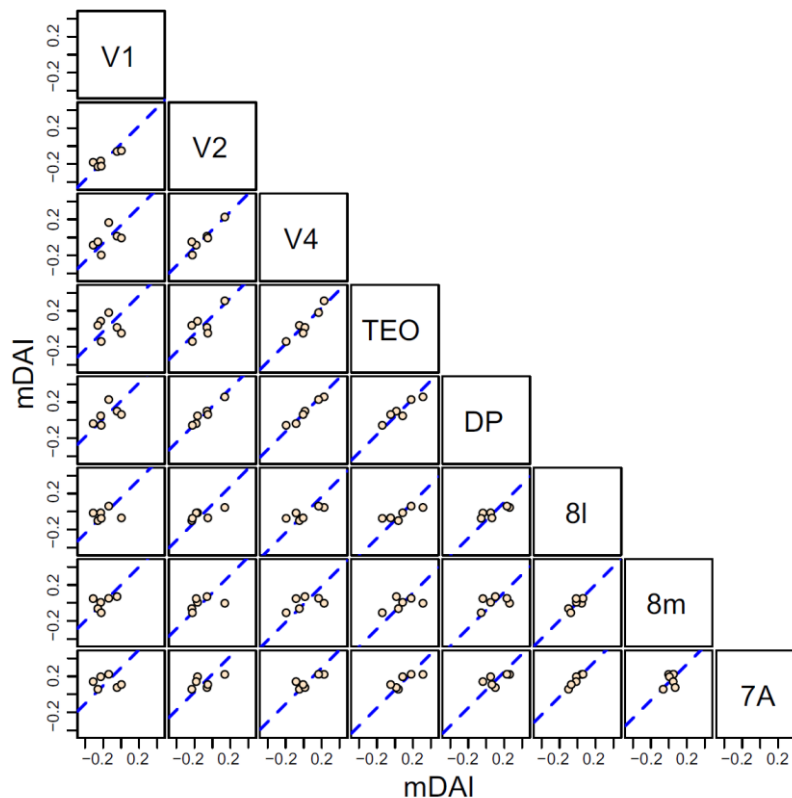

1514  
1515 **Figure 13.** Scatter plots of a hierarchical measure of cortical distance (mDAI) derived by Bastos  
1516 et al., 2015 of common source areas for pairs of 8 visual areas obtained from contrasting  
1517 Granger Causality measures in gamma, theta and beta bands. The abscissa of each graph  
1518 corresponds to the value calculated for the area at the top of the column and the ordinate to the  
1519 area at the right of the row. Dashed blue line in each plot is the best fit line of unit slope.  
1520
